1           Gene cluster conservation identifies  
2           melanin and perylenequinone  
3           biosynthesis pathways in multiple plant  
4           pathogenic fungi

Malaika K. Ebert<sup>1,2,3,\*</sup>, Rebecca E. Spanner<sup>1,2,\*</sup>, Ronnie de Jonge<sup>4,5,6,\*†</sup>, David J. Smith<sup>1</sup>, Jason Holthusen<sup>1</sup>, Gary A. Secor<sup>2</sup>, Bart P.H.J. Thomma<sup>3</sup>, & Melvin D. Bolton<sup>1,2†</sup>

<sup>1</sup>Red River Valley Agricultural Research Center, USDA Agricultural Research Service, Fargo, ND, United States. <sup>2</sup>Department of Plant Pathology, North Dakota State University, Fargo, ND, United States.

<sup>3</sup>Laboratory of Phytopathology, Wageningen University, Wageningen, the Netherlands. <sup>4</sup>Plant-Microbe Interactions, Department of Biology, Science4Life, Utrecht University, Utrecht, The Netherlands. <sup>5</sup>Department of Plant Biotechnology and Bioinformatics, Ghent University, Ghent, Belgium. <sup>6</sup>VIB Center for Plant Systems Biology.

5

6   \*These authors contributed equally to this work.

7   †Correspondence and requests for materials should be addressed to R.d.J. ([r.dejonge@uu.nl](mailto:r.dejonge@uu.nl)) or

8   M.D.B ([Melvin.Bolton@ars.usda.gov](mailto:Melvin.Bolton@ars.usda.gov)).

9

10   **Running head**

11   Perylenequinones in plant pathogenic fungi

1    **Summary**

2    Perylenequinones are a family of structurally related polyketide fungal toxins with nearly universal  
3    toxicity. These photosensitizing compounds absorb light energy which enables them to generate  
4    reactive oxygen species that damage host cells. This potent mechanism serves as an effective  
5    weapon for plant pathogens in disease establishment. The sugar beet pathogen *Cercospora beticola*  
6    secretes the perylenequinone cercosporin during infection. We have shown recently that the  
7    cercosporin toxin biosynthesis (*CTB*) gene cluster is present in several other phytopathogenic fungi,  
8    prompting the search for biosynthetic gene clusters (BGCs) of structurally similar perylenequinones  
9    in other fungi. Here, we report the identification of the elsinochrome and phleichrome BGCs of  
10    *Elsinoë fawcettii* and *Cladosporium phlei*, respectively, based on gene cluster conservation with the  
11    *CTB* and hypocrellin BGCs. Furthermore, we show that previously reported BGCs for elsinochrome  
12    and phleichrome are involved in melanin production. Phylogenetic analysis of the corresponding  
13    melanin polyketide synthases (PKSs) and alignment of melanin BGCs revealed high conservation  
14    between the established and newly identified *C. beticola*, *E. fawcettii*, and *C. phlei* melanin BGCs.  
15    Mutagenesis of the identified perylenequinone and melanin PKSs in *C. beticola* and *E. fawcettii*  
16    coupled with mass spectrometric metabolite analyses confirmed their roles in toxin and melanin  
17    production.

18

19

20    **Keywords**

21    Fungal plant pathogens, secondary metabolites, melanin, cercosporin, elsinochrome, phleichrome,  
22    hypocrellin A, perylenequinone toxins

23

1

2 **Originality and significance statement**

3 Genes involved in secondary metabolite (SM) production are often clustered together to form  
4 biosynthetic pathways. These pathways frequently have highly conserved keystone enzymes which  
5 can complicate allocation of a biosynthetic gene cluster (BGC) to the cognate SM. In our study, we  
6 utilized a combination of comparative genomics, phylogenetic analyses and biochemical approaches  
7 to reliably identify BGCs for perylenequinone toxins and DHN-melanin in multiple plant pathogenic  
8 fungi. Furthermore, we show that earlier studies that aimed to identify these perylenequinone  
9 pathways were misdirected and actually reported DHN-melanin biosynthetic pathways. Our study  
10 outlines a reliable approach to successfully identify fungal SM pathways.

## 1 Introduction

2 Fungi produce a plethora of secondary metabolites (SMs) that serve to enhance competitiveness in  
3 nature. Functional diversity of these compounds is high, including reported roles in virulence, biotic  
4 and abiotic stress protection, and as metal transport agents (Williams et al., 1989; Demain and Fang,  
5 2000; Rohlf and Churchill, 2011; Stergiopoulos et al., 2012; Keller, 2015). For example, in some  
6 occasions SMs are involved in symbiotic relationships where microbial symbionts provide an  
7 antibiotic armory against secondary infection to the symbiotically colonized plant in return for  
8 nutrients and protection (Rohlf and Churchill, 2011). A major class of fungal SMs are the polyketides  
9 (Keller et al., 2005). For the biosynthesis of fungal aromatic polyketides, non-reducing polyketide  
10 synthases (NR-PKSs) play a central role as mediators of the first biosynthetic step (Keller et al., 2005;  
11 Crawford and Townsend, 2010; Brakhage, 2013; Gallo et al., 2013). Such PKS genes contain multiple  
12 domains that work conjointly, of which the  $\beta$ -ketoacyl synthase (Guedes and Eriksson),  
13 acyltransferase (AT), and acyl-carrier protein (ACP) domain are indispensable (Kroken et al., 2003;  
14 Keller et al., 2005; Crawford and Townsend, 2010; Gallo et al., 2013). By using the domains  
15 iteratively, a PKS generates a metabolite backbone which can be modified by other enzymes to yield  
16 the final metabolite (Keller et al., 2005; Bohnert et al., 2010; Crawford and Townsend, 2010). The  
17 genes encoding these decorating enzymes are often found in direct proximity to the PKS gene to  
18 form a biosynthetic gene cluster (BGC) pathway (Keller and Hohn, 1997; Keller et al., 2005). In  
19 addition, BGCs often contain regulatory elements and transporters involved in shuttling the final  
20 secondary metabolite from the cell, and in the case of toxic metabolites, genes encoding auto-  
21 resistance proteins (Keller, 2015; de Jonge et al., 2018).

22 A well-studied BGC is the cercosporin toxin biosynthesis (*CTB*) pathway. The *CTB* gene cluster was  
23 originally identified in *Cercospora nicotianae*, causal agent of leaf spot disease on tobacco, but is  
24 present in almost all *Cercospora* species (Assante et al., 1977; Choquer et al., 2005; de Jonge et al.,  
25 2018). The ubiquitous presence of the *CTB* gene cluster in the genus is likely explained by its role as a

1 virulence facilitator (Callahan et al., 1999; Daub and Ehrenshaft, 2000; Choquer et al., 2005).  
2 Recently, de Jonge et al. (2018) used comparative genomics to show that the *CTB* gene cluster can  
3 also be found in several plant pathogenic fungal species outside the *Cercospora* genus, likely as a  
4 result of horizontal transfer of the entire *CTB* gene cluster (Bohnert et al., 2010; Crawford and  
5 Townsend, 2010; de Jonge et al., 2018). The majority of assessed species from the genus  
6 *Colletotrichum*, a large genus of crop and/or ornamental plant pathogens (Perfect et al., 1999), were  
7 shown to harbor full- to partial-length *CTB* gene clusters, of which the post-harvest apple fruit  
8 pathogen *Co. fioriniae* was shown to produce cercosporin (de Jonge et al., 2018). The core gene of  
9 the *Cercospora CTB* gene cluster is the NR-PKS gene *CTB1* (Newman and Townsend, 2016), which is  
10 flanked at both sides by nine genes that putatively encode decorating enzymes (CTB2, CTB3, CTB5,  
11 CTB6, CTB7, CTB9, CTB10, CTB11 and CTB12) (de Jonge et al., 2018). Besides those ten genes  
12 essential for toxin formation, the cluster also encodes a zinc finger transcription factor (CTB8) for  
13 regulation of cluster gene expression, and two major facilitator superfamily (MFS) transporters; CTB4  
14 that is necessary for toxin secretion and the cercosporin facilitator protein (CFP) involved in toxin  
15 auto-resistance (Chen et al., 2007; Choquer et al., 2007; de Jonge et al., 2018). Upon activation, all  
16 *CTB* pathway enzymes work in a well-orchestrated manner to synthesize the metabolite from  
17 backbone formation to secretion of the toxin into the environment whilst providing the fungus with  
18 protection against cercosporin.

19 Cercosporin is a member of the perylenequinone family that, upon photo-activation, displays almost  
20 universal toxicity to a wide spectrum of organisms (Zhenjun and Lown, 1990; Daub and Ehrenshaft,  
21 2000; Ahonsi et al., 2005; Guedes and Eriksson, 2007; Daub et al., 2013). Exposure to visible and  
22 near-UV light energetically activates perylenequinones to an excited triplet state that reacts with  
23 oxygen to form reactive oxygen species (Foote, 1976; Guedes and Eriksson, 2007). This  
24 photodynamic activity can be attributed to the 3,10-dihydroxy-4,9-perylenequinone chromophore  
25 backbone that is shared among perylenequinones (Hudson et al., 1997). Structural differences  
26 between perylenequinone family members are mostly due to divergent side chains attached to the

1 mutual backbone structure (Daub et al., 2005) (Fig. 1). For example, the methylenedioxy bridge is a  
2 unique feature of cercosporin and is absent in other perylenequinones such as hypocrellin,  
3 elsinochrome and phleichrome (Fig. 1) (Weiss et al., 1987; de Jonge et al., 2018).

4 Previous studies have implicated PKS genes in the production of perylenequinones in other plant  
5 pathogenic fungi. For example, transcriptome analysis and a CRISPR-Cas9 gene editing approach in  
6 the bamboo pathogen *Shiraia bambusicola* gave compelling evidence that *SbaPKS* encodes the PKS  
7 orchestrating hypocrellin biosynthesis (Deng et al., 2017, Zhao et al., 2016). Similarly, targeted  
8 disruption of *EfPKS1* in the citrus scab pathogen *Elsinoë fawcettii* appeared to abrogate elsinochrome  
9 production (Liao and Chung, 2008). Likewise, *Cppks1* was suggested to be responsible for PKS activity  
10 for phleichrome production in the purple eyespot pathogen *Cladosporium phlei* (So et al., 2015).  
11 However, we have previously used KS domain phylogeny to associate PKS genes with the final  
12 perylenequinone product (de Jonge et al., 2018). During the course of these analyses, we identified  
13 PKS genes for *E. fawcettii* and *C. phlei* that were not previously attributed to these perylenequinones,  
14 which prompted us to re-evaluate the findings of Liao and Chung (2008) and So et al. (2015).  
15 Interestingly, Liao and Chung (2008) also carried out phylogenetic analysis of *EfPKS1* with other PKSs  
16 which indicated that *EfPKS1* clustered closely to a diverse set of fungal non-reducing PKSs involved in  
17 biosynthesis of the toxins cercosporin, aflatoxin and sirodesmin, but also with PKSs involved in  
18 pigment production such as dihydroxynaphthalene (DHN)-melanin. Melanin is an integral component  
19 of the cell wall that has proposed functions in protection from environmental factors, appressorial  
20 penetration of host plants and pathogenesis (Wheeler and Bell, 1988; Langfelder et al., 2003; Liu and  
21 Nizet, 2009). In *Mycosphaerella fijiensis*, research suggested that secreted fungal DHN-melanin acts  
22 as a virulence factor through the photogeneration of singlet molecular oxygen in a similar manner to  
23 the perylenequinones (Beltrán-García et al., 2014). DHN-melanin biosynthesis has been characterized  
24 extensively in many fungi, including *Magnaporthe oryzae*, *Colletotrichum lagenarium*, *Alternaria*  
25 *alternata*, *Botrytis cinerea*, *Verticillium dahliae* and *Aspergillus* spp.. In the rice blast fungus *M. oryzae*  
26 for instance, DHN-melanin production is known to be mediated by a four-gene cluster which is

1 regulated in hyphae by the transcription factor Pig1 (Fig. 2) (Thompson et al., 2000; Tsuji et al., 2000;  
2 Talbot, 2003; Oh et al., 2008). However, fungal DHN-melanin pathways may vary in the biosynthesis  
3 of the first common intermediate 1,3,6,8-tetrahydroxynaphthalene (1,3,6,8-THN or T4HN). For  
4 example, the PKS ALB1 (for “albino 1”) is responsible for the first biosynthetic step in *Aspergillus*  
5 *fumigatus*, resulting in the biosynthesis of the heptaketide naphthopyrone YWA1, which is  
6 subsequently hydrolyzed by Ayl1 to produce T4HN (Fujii et al., 2004; Pihet et al., 2009). Two  
7 alternative routes can be found in the necrotrophic gray mold fungus *B. cinerea*. In this case, the PKSs  
8 Bcpks12 and Bcpks13 synthesize different precursors for the joint DHN-melanin pathway  
9 (Schumacher, 2016). While Bcpks12 produces the pentaketide T4HN directly, Bcpks13 synthesizes  
10 the hexaketide 2-acetyl-1,3,6,8-tetrahydroxynaphthalene (AT4HN) that is subsequently converted to  
11 yield T4HN (Schumacher, 2016). In either case, the resulting T4HN will serve as substrate for a  
12 hydroxynaphthalene (HN) reductase leading to scytalone formation. In the next step, scytalone will  
13 be dehydrated by a scytalone dehydratase resulting in the formation of 1,3,8-trihydroxynaphthalene  
14 (1,3,8-THN or T3HN). Subsequent reduction by a HN reductase yields vermelone which is  
15 subsequently dehydrated to form 1,8-DHN; an immediate precursor of melanin (Tsai et al., 1999;  
16 Thompson et al., 2000; Tsuji et al., 2000; Talbot, 2003).

17 In this manuscript, we show that the gene clusters housing *Cppks1* and *EfPKS1* have high similarity to  
18 established gene clusters involved in DHN-melanin biosynthesis and have only limited similarity to  
19 the perylenequinone biosynthesis clusters to which they were previously attributed. Due to its  
20 detailed characterization, the established *M. oryzae* melanin cluster was used as reference in our  
21 alignments of putative DHN-melanin gene clusters of *C. beticola*, *E. fawcettii*, *C. phlei*, and *S.*  
22 *bambusicola* to illustrate the high level of homology among the DHN-melanin BGCs. Consequently,  
23 we also sought to establish the BGCs involved in production of elsinochrome in *E. fawcettii* and  
24 phleochrome in *C. phlei*, and included targeted gene replacement of both perylenequinone and  
25 melanin PKS genes in *E. fawcettii* and *C. beticola* to provide proof for their involvement in toxin and  
26 DHN-melanin production.

## 1 Results

### 2 *E. fawcettii* and *C. phlei* genomics

3 Nuclear and mitochondrial DNA of *E. fawcettii* strain CBS 139.25 and *C. phlei* strain CBS 358.69 were  
4 sequenced to approximately 138-fold and 110-fold coverage, respectively, on the Illumina HiSeq  
5 4000 platform (paired-end, 100-bp reads). Raw reads were processed and assembled by SPAdes  
6 (version 3.9.0) yielding draft genome assemblies of 25.3 Mb on 398 scaffolds for *E. fawcettii* and 31.9  
7 Mb on 794 scaffolds for *C. phlei*. The respective scaffold N50 values and L50 numbers for these  
8 assemblies are 13 and 676 Kb, and 44 and 238 Kb. Following genome assembly, we used Augustus  
9 (version 3.2.1) with default settings (Stanke et al., 2008) and the previously devised *C. beticola*  
10 training parameters (de Jonge et al., 2018) to predict 9,519 (mean length 1,675 bp and ~2.5  
11 exons/gene) and 11,316 (mean length 1,624 bp and ~2.3 exons/gene) protein-coding genes for *E.*  
12 *fawcettii* and *C. phlei* respectively. Finally, protein function as well as putative localization was  
13 predicted by Interpro (Finn et al., 2017) scanning and yielded annotations for 9,253 out of 9,519 *E.*  
14 *fawcettii* proteins and 10,870 out of 11,316 *C. phlei* proteins. Considering only hits to Pfam, SMART,  
15 CDD or SUPERFAMILY databases, 7,450 (78%) and 8,479 (75%) genes were annotated for *E. fawcettii*  
16 and *C. phlei*, respectively.

### 17 *PKS genealogy and prediction of function*

18 To study the level of conservation of PKSs and associated pathways involved in the biosynthesis of  
19 different perylenequinones, we mined the genomes of both perylenequinone producers and non-  
20 producers for non-reducing PKSs (Suppl. Table 1). Subsequently, the phylogenetic relationships  
21 between these PKSs and those of previously characterized PKSs from selected species as found in  
22 Collemare et al. (2014) (Suppl. Table 1) were determined by aligning the highly conserved  $\beta$ -ketoacyl  
23 synthase (Guedes and Eriksson) domains of each PKS (Fig. 3). This genealogy revealed distinctive  
24 clade formation where PKSs with confirmed involvement in biosynthesis of structurally similar  
25 metabolites were observed to cluster. The clades were categorized as perylenequinone, aflatoxin,



1 anthraquinone, or DHN-melanin biosynthesis depending on the function of confirmed PKSs they  
2 harbored (Fig. 3). Interestingly, the PKSs EfPKS1 (Liao and Chung, 2008)/ [ELSAW09157-RA (this  
3 study)] from *E. fawcettii* and Cppks1 (So et al., 2015)/[CLAPH08786-RA (this study)] from *C. phlei* that  
4 were previously implicated in perylenequinone biosynthesis did not cluster phylogenetically with the  
5 established perylenequinone cercosporin PKSs CbCTB1 and CnCTB1 of *C. beticola* and *C. nicotianae*,  
6 respectively. Instead, EfPKS1 and Cppks1 formed a clade with confirmed melanin PKSs, including  
7 Bcpks12 and Bcpks13 of the gray mold fungus *B. cinerea* (Schumacher, 2016), Wdps1 of the  
8 zoopathogenic black yeast *Wangiella (Exophiala) dermatitidis* (Feng et al., 2001), GLPKS1 of the  
9 filamentous fungus *Glarea lozoyensis* (Zhang et al., 2003), NodPKS1 of an endophytic *Nodulisporium*  
10 strain (Fulton et al., 1999), COGPKS1 of the cucumber anthracnose causal agent *Co. lagenarium* (Fujii  
11 et al., 1999), the predicted *C. beticola* melanin biosynthesis PKS *CbPKS1* (CBET3\_09638) and the *S.*  
12 *bambusicola* melanin PKS SHIR08477. The finding that *E. fawcettii* ELSAW09157-RA, *C. phlei*  
13 CLAPH08786-RA, *S. bambusicola* SHIR08477, and *CbPKS1* reside in a cluster (Fig. 3) with extensive  
14 collinearity to established DHN-melanin clusters (Fig. 4) suggests a role in melanin production and  
15 hints that *EfPKS1* and *Cppks1* were previously misannotated as perylenequinone biosynthesis genes  
16 (Liao and Chung, 2008; So et al., 2015).

17 The cercosporin PKSs in *C. beticola* (CbCTB1), *C. nicotianae* (CnCTB1), and *Co. fiorinae* (EXF84093)  
18 form a perylenequinone clade with the previously confirmed hypocrellin PKS (SbaPKS) (Zhao et al.,  
19 2016; Deng et al., 2017), ELSAW08003 from *E. fawcettii*, CLAPH05460 from *C. phlei* as well as with  
20 the putative perylenequinone PKSs in *P. nodorum* (EAT83782.2), *M. oryzae* (MGG\_00428), and the *C.*  
21 *beticola* CbCTB1 paralog CBET3\_10910 (Fig. 3). As phylogenetic conservation can be an indication of  
22 related metabolite production (de Jonge et al., 2018), this clustering suggests that PKSs of this clade  
23 are involved in biosynthesis of the perylenequinones. Therefore, we suggest renaming *ELSAW08003*  
24 to *EfETB1* for elsinochrome toxin biosynthesis gene 1, and *C. phlei* CLAPH05460 to *CpPTB1* for  
25 phleichrome toxin biosynthesis gene 1.

1 *Perylenequinone and DHN-melanin biosynthesis gene cluster alignments*

2 While PKS genes are indispensable for polyketide formation, it is the full complement of genes in a  
3 BGC that is responsible for the biosynthesis of the end product. Therefore, synteny of the predicted  
4 BGCs of orthologous PKS genes was assessed. Using the established *C. beticola* *CTB* gene cluster and  
5 *S. bambusicola* hypocrellin gene cluster as references, putative perylenequinone orthologous gene  
6 clusters in *E. fawcettii*, *C. phlei*, *P. nodorum*, *M. oryzae*, and *Co. fioriniae* were aligned (Fig. 4A).  
7 Although there is evidence for gene loss and gain between the perylenequinone BGC alignments,  
8 multiple core genes are shared between cercosporin, hypocrellin, and the predicted BGCs for  
9 elsinochrome and phleichrome (Fig. 4A). Overall, eight genes are shared between the cercosporin,  
10 hypocrellin and predicted elsinochrome and phleichrome BGCs (Figs. 4A, 5). When compared to  
11 these perylenequinone pathways, the *CTB* gene cluster has two additional genes; a putative  $\alpha$ -  
12 ketoglutarate-dependent dioxygenase (*CTB9*) and a candidate dehydratase (*CTB10*) that have been  
13 shown to be involved in the formation of the methylenedioxy bridge (de Jonge et al., 2018). The  
14 predicted *C. phlei* phleichrome BGC contains all orthologous *C. beticola* *CTB* genes except for the  
15 above-mentioned *CTB9* and *CTB10*, in agreement with the lack of the methylenedioxy bridge in  
16 phleichrome. Likewise, the predicted *E. fawcettii* elsinochrome BGC lacks *CTB9* and *CTB10* as well as  
17 the cercosporin MFS transporter (*CTB4*) and the NADPH-dependent oxidoreductase (*CTB6*).  
18 Interestingly, the *E. fawcettii* BGC contains *ELSAW08009*, which only has an ortholog in the  
19 hypocrellin gene cluster (*SHIRO8482*) and in no other of the aligned BGCs (Fig. 4A). *ELSAW08009* and  
20 *SHIRO8482* are annotated as a putative salicylate hydroxylase based on sequence similarity to the  
21 conserved protein domain family TIGR03219 (E-value 2.98e-18), members of which are salicylate 1-  
22 monooxygenases. Besides sharing this gene with the elsinochrome pathway and lacking orthologs to  
23 *CTB9* and *CTB10*, the hypocrellin cluster also lacks CTB homologs *CTB4*, *CTB6*, and *CTB7* compared to  
24 the cercosporin pathway (Fig. 4A).

1 Similarly, predicted DHN-melanin clusters of *C. beticola*, *C. phlei*, *E. fawcettii*, *S. bambusicola* sp. *slf14*,  
2 and *Co. fioriniae* were aligned to the established DHN-melanin cluster of *M. oryzae*, *A. fumigatus*, *A.*  
3 *alternata*, *Bipolaris maydis* (*Cochliobolus heterostrophus*), and both alternative clusters of *B. cinerea*  
4 (Figure 4B). All BGCs share homologous PKS genes, a THN-reductase, and a prefoldin-encoding gene.  
5 Prefoldins are frequently associated with DHN-melanin BGCs, but a functional role in DHN-melanin  
6 biosynthesis has not been established to date. Furthermore, the putative melanin clusters of *C.*  
7 *beticola*, *C. phlei*, *E. fawcettii*, *S. bambusicola* sp. *slf14*, and *Co. fioriniae* contain a transcription factor  
8 with homology to *M. oryzae* Pig1 and *Co. lagenarium* CMR1, which are often observed in other  
9 established melanin clusters (Tsuji et al., 2000).

#### 10 *Targeted replacement and characterization of perylenequinone and melanin PKS genes*

11 The predicted perylenequinone and melanin PKS genes for *C. beticola* (*CbCTB1* and *CbPKS1*,  
12 respectively) and *E. fawcettii* (*EfETB1* and *EfPKS1*, respectively) were targeted for split marker gene  
13 replacement. At least two unique site-directed transformants were assessed for involvement in  
14 metabolite production. The wild type and all knockout mutant strains were grown under conditions  
15 to induce perylenequinone production. The presence or absence of cercosporin (*C. beticola*) and  
16 elsinochrome (*E. fawcettii*) in culture extracts was determined via UPLC-MS (Fig. 6A and B). For both  
17 fungal species, perylenequinone production was abrogated in the perylenequinone PKS mutants  
18 ( $\Delta CbCTB1$  and  $\Delta EfETB1$  mutants for *C. beticola* and *E. fawcettii*, respectively) but not in the melanin  
19 PKS mutants (Fig. 6A and B). There were no obvious differences in growth rate for either of the *C.*  
20 *beticola* or *E. fawcettii* mutants versus the corresponding wild type strains. Additionally,  $\Delta CbPKS1$   
21 and  $\Delta EfPKS1$  melanin mutants had a pale buff color as opposed to the dark grey pigmentation  
22 observed in wild type and perylenequinone-deficient mutant ( $\Delta CbCTB1$  and  $\Delta EfETB1$  for *C. beticola*  
23 and *E. fawcettii*, respectively) strains (Figure 7A and B). The amount of melanin present in the *C.*  
24 *beticola* cultures was determined spectrophotometrically, showing that the  $\Delta CbPKS1$  mutant had a  
25 significantly lower melanin content than the wild type ( $P < 0.05$ ) (Fig. 7C). A quantitative evaluation

1 of melanin content of *E. fawcettii* wild type and mutant cultures is yet to be reported as earlier  
2 extractions did not yield sufficient quantity for comparison.

### 3 Discussion

4 Phylogenetic analysis based on PKS KS domain conservation can help to predict SM structure and  
5 gene evolution (Keller et al., 2005; Gallo et al., 2013). In this study, we used KS domain sequence  
6 alignments and phylogenetic analysis of selected plant pathogenic fungi to separate PKSs into distinct  
7 clades. One of the clades hosted PKS genes involved with perylenequinone biosynthesis including  
8 *CbCTB1*, the well-studied *Cercospora beticola* PKS essential for cercosporin biosynthesis, and the PKS  
9 gene of the hypocrellin pathway in *S. bambusicola* sp. *slf14*. We also observed clustering of PKS genes  
10 involved in DHN-melanin formation such as *BcPKS12* and *BcPKS13* of *B. cinerea* and *COGPKS1* of *Co.*  
11 *lagenarium* (Fig. 3). As previously reported (Liao and Chung, 2008), phylogenetic analyses of KS and  
12 AT domain sequences indicated a closer relationship of EfPKS1 to melanin PKSs than to  
13 perylenequinone PKSs. Furthermore, high similarity of the full length amino acid sequence to the  
14 annotated EfPKS1 led So et al. (2015) to hypothesize that Cppks1 was involved in phleochrome  
15 production. Our KS domain alignment confirms the phylogenetic analysis by Liao and Chung (2008)  
16 where EfPKS1 and Cppks1 form a cluster with established DHN melanin biosynthesis PKSs of other  
17 Ascomycetes (Fig. 3). Consequently, we used comparisons to well-characterized melanin BGCs in  
18 various Ascomycetes to show that PKS genes belonging to the DHN-melanin clade are putatively  
19 involved with melanin biosynthesis in *C. beticola*, *E. fawcettii*, *C. phlei*, and *S. bambusicola* sp. *slf14*  
20 (Fig. 4B). Besides PKS phylogeny, whole-cluster homology of predicted cognate clusters to various  
21 well established DHN-melanin clusters strengthened our hypothesis that *CbPKS1*, *EfPKS1*, and *Cppks1*  
22 are involved with melanin production.

23 To gain further support, we generated PKS mutants in our candidate melanin biosynthesis PKS genes  
24 in *C. beticola* and *E. fawcettii*. As predicted, the melanin null mutants  $\Delta$ *EfPKS1* and  $\Delta$ *CbPKS1*  
25 displayed pale phenotypes characteristic to previously described melanin-deficient mutant strains

1 (Chumley and Valent, 1990) (Fig. 7A and B) and quantitative determination of melanin in  $\Delta CbPKS1$  of  
2 *C. beticola* indicated reduced melanin content of the culture compared to wild type and  $\Delta CbCTB1$   
3 knockout mutant lines (Fig. 7C).

4 Interestingly, the *C. beticola*  $\Delta CbPKS1$  and *E. fawcettii*  $\Delta EfPKS1$  mutants were still able to produce  
5 cercosporin and elsinochrome, respectively (Fig. 6 A and B) unlike the observation by Liao and Chung  
6 (2008) where  $\Delta EfPKS1$  mutants in *E. fawcettii* were reported to be elsinochrome-deficient. Therefore,  
7 we suspect that the phenotype they observed may be due to insufficient perylenequinone-inducing  
8 conditions. Previous functional analysis of the *EfPKS1* cluster raised questions when overexpression  
9 of predicted cluster genes under different conditions did not correlate with elsinochrome production  
10 (Chung and Liao, 2008) and complementation of the transcription factor-like gene *EfTSF1* null mutant  
11 (with *EfTSF1*) was unable to restore elsinochrome production to wild type level (Liao and Chung,  
12 2008). Furthermore, Chung and Liao (2008) stated that positive  $\Delta TSF1$  transformants were selected  
13 based on elsinochrome-deficient phenotype, potentially dismissing any true site-directed mutants  
14 that were still able to produce elsinochrome. Therefore, it could be that their elsinochrome-deficient  
15 phenotype was evoked by off target tDNA insertion. The reduction in virulence observed for their  
16  $\Delta EfPKS1$  mutant is not surprising as melanin has been reported to be a virulence factor for many  
17 filamentous fungi (Langfelder et al (2003); Liu and Nizet (2009); Wheeler and Bell, 1988). Besides  
18 contribution to fungal virulence, melanin has also been reported to play an important role in  
19 protection against environmental stresses. Recently, studies of the causal agent of Septoria tritici  
20 blotch on wheat, *Zymoseptoria tritici*, have indicated a correlation between fungicide resistance and  
21 melanization level of the producing fungus which led to the identification of the putative *Z. tritici*  
22 melanin PKS (Lendenmann et al., 2014; Lendenmann et al., 2015). Similarly, *CbPKS1* and  
23 *CBET3\_09636*, encoding a predicted tetrahydroxynaphthalene (T4HN) reductase (now renamed to  
24 *Cb4HNR* as it is homologous to *4HNR* of *M. oryzae*), that we propose to belong to the melanin BGC  
25 have been recently reported to be more highly expressed in fungicide-resistant *C. beticola* strains  
26 compared to fungicide-sensitive strains (Bolton et al., 2016). Consequently, we propose that melanin

1 production in *C. beticola* is mediated by *CbPKS1* which forms T4HN in the first biosynthetic step.  
2 Subsequently, T4HN will serve as substrate for *Cb4HNR* which reduces it to yield scytalone. Taken  
3 together, these results suggest that the *EfPKS1* and *CpPKS1* genes that were formerly predicted to be  
4 involved with elsinochrome and phleichrome biosynthesis were likely incorrectly annotated in  
5 previous publications and are involved in DHN-melanin biosynthesis.

6 To identify the legitimate elsinochrome and phleichrome PKS genes in *E. fawcettii* and *C. phlei*,  
7 respectively, we went back to our KS domain alignment where predicted PKSs CpPTB1 of *C. phlei* and  
8 EfETB1 of *E. fawcettii* clustered together with established cercosporin biosynthesis PKSs CTB1 in *C.*  
9 *beticola* and *C. nicotianae*, which hinted at their contribution to perylenequinone biosynthesis (Fig.  
10 3). In line with these initial functional predictions, alignments of the corresponding predicted gene  
11 clusters display high similarity and gene conservation within each clade (Fig. 4A). Also, structural  
12 differences between perylenequinones can be explained by comparing the predicted metabolite  
13 clusters on a gene level. For example, cercosporin and phleichrome only differ in the additional  
14 methylenedioxy bridge that is found in the cercosporin molecule (Fig. 1). Accordingly, the predicted  
15 phleichrome biosynthesis pathway lacks *CTB9* and *CTB10* that have been shown to be responsible for  
16 methylenedioxy bridge formation (de Jonge et al., 2018). Site-directed gene replacement of *EfETB1* in  
17 *E. fawcettii* and *CbCTB1* in *C. beticola* led to the successful generation of perylenequinone mutants  
18 that are deficient in toxin production under perylenequinone-inducing conditions (Fig. 6A and B).  
19 Since SM production relies on different environmental conditions, not every medium is suitable to  
20 activate SM production (Calvo et al., 2002; VanderMolen et al., 2013). For *C. beticola*, research on  
21 cercosporin-inducing conditions resulted in the identification of thin PDA plates in combination with  
22 natural light as the induction condition of choice (Frandsen, 1955; Fajola, 1978; Jenns et al., 1989),  
23 which was shown here to stimulate elsinochrome production.

24 In conclusion, we have shown that it is possible to identify BGCs of structurally related SM  
25 compounds based on the phylogenetic relationship of their encompassing PKSs and overall

1 conservation level of the associated cluster genes. By using an established *CTB* gene cluster as  
2 reference, it was possible to single out gene clusters responsible for the synthesis of related  
3 perylenequinone compounds in different fungal species. Likewise, we successfully identified clusters  
4 associated with DHN-melanin production in *C. beticola*, *E. fawcettii*, *C. phlei*, *P. nodorum*, and *S.*  
5 *bambusicola* using the same approach and the confirmed DHN-melanin cluster as input. Future  
6 research using this methodology will be useful for the identification of other perylenequinones and  
7 their corresponding BGCs in other fungi.

8

## 9 **Experimental procedures**

### 10 *Elsinoë fawcettii* and *Cladosporium phlei* genome sequencing

11 For high-quality genomic DNA extraction of *Elsinoë fawcettii* strain CBS 139.25 and *Cladosporium*  
12 *phlei* strain CBS 358.69, mycelia was scraped from the surface of PDA agar petri dishes and extracted  
13 using the CTAB method (Bolton et al., 2016). Library preparation (500 bp) and subsequent paired-end  
14 (PE) genome sequencing was done by BGI via the Illumina HiSeq 4000 platform. Approximately 34  
15 million high-quality sequence reads with an average length of 100 bp were generated for both  
16 samples, representing 134- and 111-fold coverage for *E. fawcettii* and *C. phlei* respectively. Draft  
17 genomes were assembled using SPAdes (version 3.9.0), with default parameters and k-mers 21, 33,  
18 55, 77 and 99. Prediction of protein-coding gene models was performed *ab initio* using the previously  
19 prepared *Cercospora beticola* training parameters (de Jonge et al., 2018) in Augustus (version 3.2.1).  
20 Genome sequences and annotations are submitted to NCBI and permanently linked on figshare  
21 under doi <https://doi.org/10.6084/m9.figshare.6173834>.

### 22 *Secondary metabolite phylogenetic analyses*

23 Phylogenetic analysis of the type I PKS genes and phylogenetic tree analyses were largely performed  
24 as described in de Jonge et al. (2018). In short, we used Pfam domain scanning analyses by HMMER3

1 (Mistry et al., 2013) with hmm profiles for domains PF00109.25 (Beta-ketoacyl synthase, N-terminal  
2 domain) and PF02801.21 (Beta-ketoacyl synthase, C-terminal domain) to identify all PKSs in the  
3 predicted proteomes of *C. beticola* (09-40), *C. phlei* (CBS 358.69), *E. fawcettii* (CBS 139.25), *S.*  
4 *bambusicola* (Slf14), *P. nodorum* (SN15), *C. heterostrophus* (C5), *A. alternata* (SRC1lrK2f), *A.*  
5 *fumigatus* (Af293), *B. cinerea* (B05.10), *Co. fioriniae* (PJ7), and *M. oryzae* (70-15) that were obtained  
6 from NCBI GenBank or Ensemble Fungi. In total we identified 240 proteins across these 11  
7 proteomes. In addition, we added 70 PKSs from Collemare et al. (2014) and Cppks1 (AFP89389.1)  
8 from So et al. (2015). All selected proteins for further analyses are listed in Supplementary Table 1.  
9 All 311 PKS proteins were subsequently aligned by Mafft (v7.271) using default parameters, after  
10 which we extracted the KS domain proportion as previously defined by Pfam scanning. This resulted  
11 in an alignment with 311 proteins across 832 positions, that was used to prepare a maximum  
12 likelihood phylogenetic tree using RAxML (version 8.2.11), incorporating 100 rapid bootstraps and  
13 subsequent automatic, thorough ML search. We then selected the subclass of 94 non-reducing PKSs  
14 for further analysis, as defined previously by Kroken et al. (2003). The final phylogenetic tree and  
15 figure was prepared in EvolView (Zhang et al., 2012). In this tree, we collapsed the outgroup clade  
16 with 20 members containing PKSs involved with citrinin biosynthesis, as indicated in Figure 4.  
17 Inclusion in the final set of 74 non-collapsed, non-reducing PKSs is indicated in Supplementary  
18 Table 1.

#### 19 *Secondary metabolite cluster alignment visualization*

20 For comparative analyses of the secondary metabolite clusters across multiple genome sequences  
21 we initially identified orthologous protein families across the beforementioned proteomes using  
22 orthoFinder (Emms and Kelly, 2015). Subsequently, we used the MultiGeneBlast algorithm  
23 (multigeneblast.sourceforge.net), integral part of antiSMASH (Weber et al., 2015), to prepare gene-  
24 by-gene cluster alignments across all species and we then re-colored individual genes within each  
25 gene cluster according to the protein family analysis.



1 *Deletion mutant generation*

2 Site-directed gene replacements of *CTB1* and *CbPKS1* in *C. beticola* strain 1-90 and of *EfETB1* and  
3 *EfPKS1* in *E. fawcettii* strain CBS 139.25 were generated using the split-marker approach as described  
4 in Bolton *et al.*, 2016. Primers are listed in Supl. Table 2. Regardless of phenotype, all putative knock-  
5 out mutants were screened for site-directed gene replacement. Successful gene deletion was  
6 confirmed by the presence of a PCR product using a forward primer upstream of the 5' flanking  
7 region of the target gene design and hygromycin reverse primer MDB-1145. Additionally, absence of  
8 an amplicon using target gene- specific primers reconfirmed deletion of the target gene (Supl. Table  
9 2).

10 *Perylenequinone production assay*

11 Mycelial plugs of 5 mm in diameter from PKS mutant and wild type *C. beticola* and *E. fawcettii* strains  
12 were grown on thin potato dextrose agar (PDA, Difco™, BD Diagnostic Systems, Sparks, USA) plates  
13 (3.0 mL PDA in a 50 mm Petri plate, amended with 150 µg ml<sup>-1</sup> hygromycin B (Roche, Mannheim,  
14 Germany) (for mutant strains) under a natural light-dark cycle at 21 °C for 7 days. Three 5 mm  
15 diameter mycelial plugs of each *E. fawcettii* strain were ground with a micro-pestle in 1 mL potato  
16 dextrose broth (PDB, Difco™, BD Diagnostic Systems, Sparks, USA), spread onto thin PDA plates and  
17 were grown under 24 hrs light at 28 °C for 7 days.

18 Total mycelial tissue was excised from the agar plate, blended at high speed for 20 s and extracted  
19 with ethyl acetate whilst stirring for 5 min in the dark. Single plate extracts were filtered using two  
20 layers of miracloth and dried under a stream of nitrogen (21 °C). The reddish-brown residues were  
21 resuspended in 200 µl methanol. Cercosporin concentration was calculated by measuring  
22 absorbance at 255 nm using an Agilent Cary 8454 UV-Visible spectrophotometer (Agilent  
23 Technologies, Inc., Santa Clara, USA) and 21, 500 as the molar extinction coefficient (Milat and Blein,  
24 1995). Extracts were diluted to ~100 pg µl<sup>-1</sup> with methanol and centrifuged at 3,000 x g for 5 min. At a

1 minimum, duplicate plate extracts were submitted for mass spectrometric analyses of each fungal  
2 strain.

### 3 *Mass spectrometric analyses*

4 Positive mode electrospray ionization settings were optimized for cercosporin by infusing a  
5 methanolic cercosporin standard (5 ng/ $\mu$ L) (Sigma; St. Louis, USA) into a Waters (Milford, MA)  
6 Acquity triple quadrupole mass spectrometer. The precursor ion, product ions, optimum collision  
7 energies, and cone voltage were determined by the AutoTune Wizard within the MassLynx 4.1  
8 software (Waters; Milford, MA). Ion transitions used for cercosporin detection were  $m/z$  535  $\rightarrow$  415  
9 and  $m/z$  535  $\rightarrow$  485 using a cone voltage of 60 and collision energies of 25 and 20 V, respectively.

10 Elsinochrome standard was not available, therefore an extract from wild type *E. fawcettii* was infused  
11 into the mass spectrometer and fragmentation of ions appearing at  $m/z$  547 (the molecular mass of  
12 elsinochromes B & D) were optimized using the AutoTune Wizard within the MassLynx 4.1.  
13 Presumptive elsinochrome ion transitions used were  $m/z$  547  $\rightarrow$  487 and  $m/z$  547  $\rightarrow$  457 using a  
14 cone voltage of 60 and collision energies of 20 and 35 V, respectively. In some elsinochrome  
15 analyses, the mass spectrometer was used as a single sector instrument to collect molecular ions at  
16  $m/z$  547 (elsinochromes B & D),  $m/z$  545 (elsinochrome A), and  $m/z$  549 (elsinochrome C). For both  
17 cercosporin and elsinochrome MS/MS experiments, the desolvation temperature was set at 500 °C,  
18 and the source temperature was set at 150 °C. Cone gas ( $N_2$ ) flow was set at 50 L/h and desolvation  
19 gas flow was set at 800 L/h, whereas the collision gas (Ar) flow was 0.16 mL/min.

20 Cercosporin and elsinochrome (isomers B and D) were analyzed using liquid chromatography-tandem  
21 mass spectrometry (LC-MS/MS) using a Waters (Milford, MA; USA) Acquity UPLC and Acquity triple-  
22 quadrupole mass spectrometer. Data were acquired, processed, and quantified using MassLynx 4.1  
23 with Target Lynx systems. Aliquots of sample extracts (10  $\mu$ L) were injected onto a 2.1 x 30 mm (1.7  
24  $\mu$ m) Acquity CSH C18 column protected by a 2.1 x 5 mm CHS guard column (Waters; Milford, MA,  
25 USA). Cercosporin and elsinochrome were eluted with a binary gradient consisting of solvent A (0.1%

1 formic acid in pure water) and solvent B (0.1% formic acid in acetonitrile) flowing at 1 mL/min. The  
2 gradient program was started at 95% A and transitioned to 25% A over 2 minutes, 5% A at 2.1  
3 minutes, and held at 5% A until 2.5 min when solvent A was ramped back to 95% A at 3 minutes.  
4 Solvent composition was held constant until the end of the run time at 4 min. The column  
5 temperature was 30°C.

#### 6 *Melanin production assay*

7 Three mycelial plugs of 5 mm diameter from each of wild type and mutant *C. beticola* strains were  
8 ground with a micropestle in 1 mL V8 broth (10% (v/v) clarified V8 juice (Campbell's Soup Co.,  
9 Camden, USA), 0.5% (w/v) CaCO<sub>3</sub>) and spread onto single Nylon membranes (Nytran® SuPerCharge  
10 Nylon transfer membrane, Schleicher and Schuell, Keene, USA) overlaying V8 agar (as broth but with  
11 1.5% (w/v) agar (BD, Franklin Lakes, USA)) plates (6 mL in a 50 mm Petri plate). *C. beticola* was grown  
12 under constant light at 21 °C for 7 days. *E. fawcettii* strains were grown in the same way as *C. beticola*  
13 but mycelial plugs were ground in Fries media (as described in Friesen and Faris (2012)) and grown  
14 on Fries agar (1.5 % (w/v) agar, 6 mL in a 50 mm Petri plate) at 21 °C under 24 hrs light for 10 days.  
15 Total mycelial tissue was excised and weighed before extracting melanin according to Gadd (1982).  
16 The tissue was boiled for 5 min in 10 mL distilled water, centrifuged, and the pigment extracted from  
17 the supernatant by autoclaving with 3 mL of 1 M NaOH (20 mins, 120 °C). The extract was then  
18 acidified to pH 2 with concentrated HCl to precipitate melanin. The precipitate was washed three  
19 times with distilled water and dried under a stream of nitrogen (21 °C).

20 Melanin extracts were solubilized in 2 mL of 2M sodium hydroxide at 50 °C. A spectrophotometric  
21 assay was used as described by Kauser et al. (2003) to measure melanin absorbance at 475 nm with a  
22 standard curve of synthetic melanin (Sigma-Aldrich, Milwaukee, USA) from 1-100 µg per ml to  
23 determine melanin content. The mean melanin content was determined as micrograms of melanin  
24 per gram of mycelial tissue for three replicates (individual cultures) and the standard error of the  
25 mean calculated. One-way ANOVA was performed with a post-hoc Tukey HSD test to determine

1 differences between the mean melanin contents of wild type strains and each of the three mutants  
2 for *C. beticola* and *E. fawcettii*, using a P-value of 0.05 as the significance threshold.

### 3 **Acknowledgments**

4 This project was supported in part by USDA-ARS CRIS project 3060-22000-049. Work in the  
5 laboratory of B.P.H.J.T. is supported by the Research Council Earth and Life Sciences (ALW) of the  
6 Netherlands Organization of Scientific Research (NWO). M.E. was supported by NWO grant  
7 833.13.007. R.d.J. was financially supported by an EMBO Long-Term Fellowship (ALTF 359-2013) and  
8 a postdoctoral fellowship of the Research Foundation Flanders (FWO 12B8116N). We thank J.  
9 Neubauer (USDA – ARS) for excellent technical assistance. Mention of trade names or commercial  
10 products in this publication is solely for the purpose of providing specific information and does not  
11 imply recommendation or endorsement by the U.S. Department of Agriculture.

1 **FIGURE LEGENDS**

2 **Figure 1. Structures of related perylenequinones.** Cercosporin synthesized by *Cercospora* spp.,  
3 phleichrome by *C. phlei* and elsinochromes A, B, C, and D produced by *E. fawcettii* are structurally  
4 related as they share a common perylenequinones backbone (center; indicated in the molecule  
5 structure in gray). Structural differences between the molecules are mostly due to various side chains  
6 (indicated in red). Differences between perylenequinones are observed at positions 2, 2' and 7, 7'.

7 **Figure 2. Schematic DHN-melanin biosynthesis pathway of *M. oryzae*.** In the first biosynthetic step,  
8 the PKS ALB1 forms 1,3,6,8-tetrahydroxynaphthalene (1,3,6,8-THN or T4HN) by ketide cyclization.  
9 Reduction by the tetrahydroxynaphthalene reductase 4HNR results in the formation of scytalone  
10 which will be dehydrated by RYS1, a scytalone dehydratase, to yield trihydroxynaphthalene (T3HN).  
11 The T3HN reductase BUF1 subsequently reduces T3HN to vermelone followed by a dehydration step  
12 mediated by RYS1 to form dihydroxynaphthalene (2HN), the immediate precursor of melanin.

13 **Figure 3. Phylogeny of PKS genes of related Ascomycetes revealing distinct DHN-melanin and**  
14 **perylenequinone subclades.** Circular maximum likelihood phylogenetic tree illustrating the  
15 phylogenetic relationship of all predicted non-reducing polyketide synthase (PKS) from the selected  
16 species set (Supl. Table 1) plus those derived from the set of PKSs used by Collemare et al. (2014).  
17 The tree was constructed by maximum-likelihood analysis of aligned full-length  $\beta$ -ketoacyl synthase  
18 domains. The outside ring indicates domain architecture of each PKS determined by Pfam domain  
19 annotation. Protein accessions are colored depending on the taxonomic class of the producing  
20 species. The corresponding species identity for each protein can be found in the bottom left corner.  
21 Established biosynthetic end products for a subset of the listed PKSs is indicated by the background  
22 color, highlighting two DHN-melanin sub-groups, naphthoquinones, anthraquinones,  
23 perylenequinones, aflatoxin-like compounds and resorcylic acid lactones.

24 **Figure 4. Synteny and rearrangements of conserved perylenequinone and DHN-melanin BGCs.**  
25 Phylogenetic tree of Ascomycetes used in this study based on mash protein-level kmer hash overlaps.

1 Alignments were based on MultiGeneBlast with a selected set of genomes and an input BGC as  
2 query. Alignment of established and putative perylenequinone BGCs of *E. fawcettii*, *C. beticola*, *C.*  
3 *phlei*, *P. nodorum*, *S. bambusicola*, *M. oryzae*, and *Co. fiorinae* (A). For the DHN-melanin BGC  
4 alignment, putative and established DHN-melanin BGCs of *E. fawcettii*, *C. beticola*, *C. phlei*, *P.*  
5 *nodorum*, *S. bambusicola*, *M. oryzae*, *Co. fiorinae*, *A. fumigatus*, *A. alternata*, *B. maydis* (*C.*  
6 *heterostrophus*), and *B. cinerea* were aligned (B). For all species, the indicated identifiers are  
7 transcript IDs and the corresponding sequences can be retrieved from Ensemble Fungi and/or NCBI  
8 GenBank. *CTB* orthologs are colored relative to the *C. beticola* *CTB* cluster genes while DHN-melanin  
9 BGC genes are color coded relative to *M. oryzae* DHN-melanin. Color key and annotated functions  
10 are explained in the legend below the cluster graphics.

11 **Figure 5. Conserved and unique genes in the confirmed or predicted perylenequinone BGCs of *C.***  
12 ***beticola*, *E. fawcettii*, *C. phlei*, and *S. bambusicola*.** Venn diagram highlights the number of shared  
13 BGC genes of the cercosporin, elsinochrome, phleochrome, and hypocrellin pathways.

14 **Figure 6. Perylenequinone toxin detection in *C. beticola* and *E. fawcettii* perylenequinone and**  
15 **melanin PKS mutants compared to wild type strains after growth under perylenequinone-inducing**  
16 **conditions.** Representative UPLC mass-selective detection of cercosporin (column A) and  
17 elsinochrome B/D (column B) are shown for each fungal strain (minimum of 2 plate extracts per  
18 strain). Cercosporin (column A) was present in *C. beticola* wild type and the *Cb* $\Delta$ *PKS1* mutants at a  
19 (retention time 1.48 min) but not in the *Cb* $\Delta$ *CTB1* mutants (the cercosporin standard produced a  
20 mass-selective chromatogram with an identical retention time; data not shown). An elsinochrome  
21 B/D peak (column B) was present in wild type *E. fawcettii* and *Ef* $\Delta$ *PKS1* strains, retention time 1.58  
22 min, and was undetectable in *Ef* $\Delta$ *ETB1* mutants (no chemical-grade standard available).

23 **Figure 7. Melanin production in *C. beticola* perylenequinone and melanin PKS mutants compared**  
24 **to wild type.** Photos of *C. beticola* strains grown on V8 agar in conditions conducive to sporulation  
25 (described in methods) (A). Photos of *E. fawcettii* grown on Fries agar in conditions conducive to

- 1 melanin production (B). The mean melanin content of three individual fungal cultures ( $\mu\text{g}$  melanin/g
- 2 of mycelial tissue  $\pm$  standard error) in (C) *C. beticola* wild type (WT), melanin mutants (*Cb $\Delta$ PKS1*), and
- 3 cercosporin mutants (*Cb $\Delta$ CTB1*). Significant differences ( $P < 0.05$ ) indicated by \*.

## 1   **References**

- 2   Ahonsi, M.O., Maurhofer, M., Boss, D., and Défago, G. (2005) Relationship between aggressiveness of  
3   Stagonospora sp. isolates on field and hedge bindweeds, and in vitro production of fungal metabolites  
4   cercosporin, elsinochrome A and leptosphaerodione. *European Journal of Plant Pathology* **111**: 203-215.
- 5   Assante, G., Locci, R., Camarda, L., Merlini, L., and Nasini, G. (1977) Screening of the genus *Cercospora* for  
6   secondary metabolites. *Phytochemistry* **16**: 243-247.
- 7   Beltrán-García, M.J., Prado, F.M., Oliveira, M.S., Ortiz-Mendoza, D., Scalfo, A.C., Pessoa, A., Jr. et al. (2014)  
8   Singlet Molecular Oxygen Generation by Light-Activated DHN-Melanin of the Fungal Pathogen *Mycosphaerella*  
9   *fijiensis* in Black Sigatoka Disease of Bananas. *PLOS ONE* **9**: e91616.
- 10   Bohnert, M., Wackler, B., and Hoffmeister, D. (2010) Spotlights on advances in mycotoxin research. *Applied*  
11   *Microbiology and Biotechnology* **87**: 1-7.
- 12   Bolton, M.D., Ebert, M.K., Faino, L., Rivera-Varas, V., de Jonge, R., Van de Peer, Y. et al. (2016) RNA-  
13   sequencing of *Cercospora beticola* DMI-sensitive and -resistant isolates after treatment with tetraconazole  
14   identifies common and contrasting pathway induction. *Fungal Genetics and Biology* **92**: 1-13.
- 15   Brakhage, A.A. (2013) Regulation of fungal secondary metabolism. *Nature Reviews Microbiology* **11**: 21-32.
- 16   Callahan, T.M., Rose, M.S., Meade, M.J., Ehrenshaft, M., and Upchurch, R.G. (1999) CFP, the Putative  
17   Cercosporin Transporter of *Cercospora kikuchii*, Is Required for Wild Type Cercosporin Production, Resistance,  
18   and Virulence on Soybean. *Molecular Plant-Microbe Interactions* **12**: 901-910.
- 19   Calvo, A.M., Wilson, R.A., Bok, J.W., and Keller, N.P. (2002) Relationship between secondary metabolism and  
20   fungal development. *Microbiology and Molecular Biology Reviews* **66**: 447-459.
- 21   Chen, H.-Q., Lee, M.-H., and Chung, K.-R. (2007) Functional characterization of three genes encoding putative  
22   oxidoreductases required for cercosporin toxin biosynthesis in the fungus *Cercospora nicotianae*. *Microbiology*  
23   **153**: 2781-2790.
- 24   Choquer, M., Lee, M.-H., Bau, H.-J., and Chung, K.-R. (2007) Deletion of a MFS transporter-like gene in  
25   *Cercospora nicotianae* reduces cercosporin toxin accumulation and fungal virulence. *FEBS Letters* **581**: 489-  
26   494.
- 27   Choquer, M., Dekkers, K.L., Chen, H.-Q., Cao, L., Ueng, P.P., Daub, M.E., and Chung, K.-R. (2005) The CTB1  
28   gene encoding a fungal polyketide synthase is required for cercosporin biosynthesis and fungal virulence of  
29   *Cercospora nicotianae*. *Molecular plant-microbe interactions* **18**: 468-476.
- 30   Chumley, F.G., and Valent, B. (1990) Genetic analysis of melanin-deficient, nonpathogenic mutants of  
31   *Magnaporthe grisea*. *Mol Plant-Microbe Interact* **3**: 135-143.
- 32   Chung, K.-R., and Liao, H.-L. (2008) Determination of a transcriptional regulator-like gene involved in  
33   biosynthesis of elsinochrome phytotoxin by the citrus scab fungus, *Elsinoë fawcettii*. *Microbiology* **154**: 3556-  
34   3566.
- 35   Collemare, J., Griffiths, S., Cox, R., and de Wit, P. (2014) Secondary metabolism and biotrophic lifestyle in the  
36   tomato pathogen *Cladosporium fulvum*: from comparative genomics to reconstruction of biosynthetic pathways.  
37   In *Book of Abstracts 10th International Mycological Congress*, p. 41.
- 38   Crawford, J.M., and Townsend, C.A. (2010) New insights into the formation of fungal aromatic polyketides.  
39   *Nature Reviews Microbiology* **8**: 879-889.
- 40   Daub, M.E., and Ehrenshaft, M. (2000) The photoactivated *Cercospora* toxin cercosporin: contributions to plant  
41   disease and fundamental biology. *Annual review of phytopathology* **38**: 461-490.
- 42   Daub, M.E., Herrero, S., and Chung, K.-R. (2005) Photoactivated perylenequinone toxins in fungal pathogenesis  
43   of plants. *FEMS Microbiology Letters* **252**: 197-206.
- 44   Daub, M.E., Herrero, S., and Chung, K.R. (2013) Reactive oxygen species in plant pathogenesis: the role of  
45   perylenequinone photosensitizers. *Antioxid Redox Signal* **19**: 970-989.



- 1 de Jonge, R., Ebert, M.K., Huitt-Roehl, C.R., Pal, P., Suttle, J.C., Spanner, R.E. et al. (2018) Gene cluster  
2 conservation provides insight into cercosporin biosynthesis and extends production to the genus *Colletotrichum*.  
3 *Proceedings of the National Academy of Sciences* **115**: E5459-E5466.
- 4 Demain, A.L., and Fang, A. (2000) The natural functions of secondary metabolites. In *History of Modern*  
5 *Biotechnology I*: Springer, pp. 1-39.
- 6 Deng, H., Gao, R., Liao, X., and Cai, Y. (2017) Genome editing in *Shiraia bambusicola* using CRISPR-Cas9  
7 system. *Journal of Biotechnology* **259**: 228-234.
- 8 Emms, D.M., and Kelly, S. (2015) OrthoFinder: solving fundamental biases in whole genome comparisons  
9 dramatically improves orthogroup inference accuracy. *Genome Biology* **16**: 157.
- 10 Fajola, A.O. (1978) Cercosporin, a phytotoxin from *Cercospora* spp. *Physiological Plant Pathology* **13**: 157-164.
- 11 Feng, B., Wang, X., Hauser, M., Kaufmann, S., Jentsch, S., Haase, G. et al. (2001) Molecular Cloning and  
12 Characterization of WdPKS1, a Gene Involved in Dihydroxynaphthalene Melanin Biosynthesis and Virulence in  
13 *Wangiella* (*Exophiala*) *dermatitidis*. *Infection and Immunity* **69**: 1781-1794.
- 14 Finn, R.D., Attwood, T.K., Babbitt, P.C., Bateman, A., Bork, P., Bridge, A.J. et al. (2017) InterPro in 2017—  
15 beyond protein family and domain annotations. *Nucleic Acids Research* **45**: D190-D199.
- 16 Foote, C.S. (1976) Photosensitized oxidation and singlet oxygen. *Free radicals in biology* **2**: 85-133.
- 17 Frandsen, N. (1955) Untersuchungen über *Cercospora beticola*. *Verhalten des Pilzes in künstlicher Kultur*  
18 *Zucker* **8**: 451-456.
- 19 Friesen, T.L., and Faris, J.D. (2012) Characterization of Plant-Fungal Interactions Involving Necrotrophic  
20 Effector-Producing Plant Pathogens. In *Plant Fungal Pathogens: Methods and Protocols*. Bolton, M.D., and  
21 Thomma, B.P.H.J. (eds). Totowa, NJ: Humana Press, pp. 191-207.
- 22 Fujii, I., Mori, Y., Watanabe, A., Kubo, Y., Tsuji, G., and Ebizuka, Y. (1999) Heterologous Expression and  
23 Product Identification of *Colletotrichum lagenarium* Polyketide Synthase Encoded by the PKS1 Gene Involved in  
24 Melanin Biosynthesis. *Bioscience, Biotechnology, and Biochemistry* **63**: 1445-1452.
- 25 Fujii, I., Yasuoka, Y., Tsai, H.-F., Chang, Y.C., Kwon-Chung, K.J., and Ebizuka, Y. (2004) Hydrolytic Polyketide  
26 Shortening by Ayg1p, a Novel Enzyme Involved in Fungal Melanin Biosynthesis. *Journal of Biological Chemistry*  
27 **279**: 44613-44620.
- 28 Fulton, T.R., Ibrahim, N., Losada, M.C., Grzegorski, D., and Tkacz, J.S. (1999) A melanin polyketide synthase  
29 (PKS) gene from *Nodulisporium* sp. that shows homology to the *pkS1* gene of *Colletotrichum lagenarium*.  
30 *Molecular and General Genetics MGG* **262**: 714-720.
- 31 Gadd, G.M. (1982) Effects of media composition and light on colony differentiation and melanin synthesis in  
32 *Microdochium bolleyi*. *Transactions of the British Mycological Society* **78**: 115-122.
- 33 Gallo, A., Ferrara, M., and Perrone, G. (2013) Phylogenetic study of polyketide synthases and nonribosomal  
34 peptide synthetases involved in the biosynthesis of mycotoxins. *Toxins* **5**: 717-742.
- 35 Guedes, R.C., and Eriksson, L.A. (2007) Photophysics, photochemistry, and reactivity: molecular aspects of  
36 perylenequinone reactions. *Photochemical & Photobiological Sciences* **6**: 1089-1096.
- 37 Hudson, J., Imperial, V., Haugland, R., and Diwu, Z. (1997) Antiviral activities of photoactive perylenequinones.  
38 *Photochemistry and photobiology* **65**: 352-354.
- 39 Jenns, A., Daub, M., and Upchurch, R. (1989) Regulation of cercosporin accumulation in culture by medium and  
40 temperature manipulation. *Phytopathology* **79**: 213-219.
- 41 Kauser, S., Schallreuter, K.U., Thody, A.J., Tobin, D.J., and Gummer, C. (2003) Regulation of Human Epidermal  
42 Melanocyte Biology By  $\beta$ -Endorphin. *Journal of Investigative Dermatology* **120**: 1073-1080.
- 43 Keller, N.P. (2015) Translating biosynthetic gene clusters into fungal armor and weaponry. *Nature chemical*  
44 *biology* **11**: 671-677.
- 45 Keller, N.P., and Hohn, T.M. (1997) Metabolic Pathway Gene Clusters in Filamentous Fungi. *Fungal Genetics and*  
46 *Biology* **21**: 17-29.

- 1 Keller, N.P., Turner, G., and Bennett, J.W. (2005) Fungal secondary metabolism—from biochemistry to  
2 genomics. *Nature Reviews Microbiology* **3**: 937-947.
- 3 Kroken, S., Glass, N.L., Taylor, J.W., Yoder, O.C., and Turgeon, B.G. (2003) Phylogenomic analysis of type I  
4 polyketide synthase genes in pathogenic and saprobic ascomycetes. *Proceedings of the National Academy of  
5 Sciences* **100**: 15670-15675.
- 6 Langfelder, K., Streibel, M., Jahn, B., Haase, G., and Brakhage, A.A. (2003) Biosynthesis of fungal melanins  
7 and their importance for human pathogenic fungi. *Fungal Genetics and Biology* **38**: 143-158.
- 8 Lendenmann, M.H., Croll, D., and McDonald, B.A. (2015) QTL mapping of fungicide sensitivity reveals novel  
9 genes and pleiotropy with melanization in the pathogen *Zyloseptoria tritici*. *Fungal Genetics and Biology* **80**:  
10 53-67.
- 11 Lendenmann, M.H., Croll, D., Stewart, E.L., and McDonald, B.A. (2014) Quantitative Trait Locus Mapping of  
12 Melanization in the Plant Pathogenic Fungus *Zyloseptoria tritici*. *G3: Genes|Genomes|Genetics* **4**:  
13 2519-2533.
- 14 Liao, H.-L., and Chung, K.-R. (2008) Genetic Dissection Defines the Roles of Elsinochrome Phytotoxin for Fungal  
15 Pathogenesis and Conidiation of the Citrus Pathogen *Elsinoë fawcettii*. *Molecular Plant-Microbe Interactions* **21**:  
16 469-479.
- 17 Liu, G.Y., and Nizet, V. (2009) Color me bad: microbial pigments as virulence factors. *Trends in Microbiology*  
18 **17**: 406-413.
- 19 Milat, M.-L., and Blein, J.-P. (1995) *Cercospora beticola* toxins III. Purification, thin-layer and high performance  
20 liquid chromatographic analyses. *Journal of Chromatography A* **699**: 277-283.
- 21 Mistry, J., Finn, R.D., Eddy, S.R., Bateman, A., and Punta, M. (2013) Challenges in homology search: HMMER3  
22 and convergent evolution of coiled-coil regions. *Nucleic Acids Research* **41**: e121-e121.
- 23 Newman, A.G., and Townsend, C.A. (2016) Molecular Characterization of the Cercosporin Biosynthetic Pathway  
24 in the Fungal Plant Pathogen *Cercospora nicotianae*. *Journal of the American Chemical Society*.
- 25 Oh, Y., Donofrio, N., Pan, H., Coughlan, S., Brown, D.E., Meng, S. et al. (2008) Transcriptome analysis reveals  
26 new insight into appressorium formation and function in the rice blast fungus *Magnaporthe oryzae*. *Genome  
27 Biology* **9**: R85.
- 28 Perfect, S.E., Hughes, H.B., O'Connell, R.J., and Green, J.R. (1999) *Colletotrichum*: A Model Genus for Studies  
29 on Pathology and Fungal-Plant Interactions. *Fungal Genetics and Biology* **27**: 186-198.
- 30 Pihet, M., Vandeputte, P., Tronchin, G., Renier, G., Saulnier, P., Georgeault, S. et al. (2009) Melanin is an  
31 essential component for the integrity of the cell wall of *Aspergillus fumigatus* conidia. *BMC Microbiology* **9**: 177.
- 32 Rohlf, M., and Churchill, A.C.L. (2011) Fungal secondary metabolites as modulators of interactions with insects  
33 and other arthropods. *Fungal Genetics and Biology* **48**: 23-34.
- 34 Schumacher, J. (2016) DHN melanin biosynthesis in the plant pathogenic fungus *Botrytis cinerea* is based on  
35 two developmentally regulated key enzyme (PKS)-encoding genes. *Molecular Microbiology* **99**: 729-748.
- 36 So, K.-K., Chung, Y.-J., Kim, J.-M., Kim, B.-T., Park, S.-M., and Kim, D.-H. (2015) Identification of a Polyketide  
37 Synthase Gene in the Synthesis of Phleochrome of the Phytopathogenic Fungus *Cladosporium phlei*. *Molecules  
38 and Cells* **38**: 1105-1110.
- 39 Stanke, M., Diekhans, M., Baertsch, R., and Haussler, D. (2008) Using native and syntenically mapped cDNA  
40 alignments to improve de novo gene finding. *Bioinformatics* **24**: 637-644.
- 41 Stergiopoulos, I., Collemare, J., Mehrabi, R., and De Wit, P.J. (2012) Phytotoxic secondary metabolites and  
42 peptides produced by plant pathogenic Dothideomycete fungi. *FEMS microbiology reviews* **37**: 67-93.
- 43 Talbot, N.J. (2003) On the Trail of a Cereal Killer: Exploring the Biology of *Magnaporthe grisea*. *Annual Review  
44 of Microbiology* **57**: 177-202.
- 45 Thompson, J.E., Fahnestock, S., Farrall, L., Liao, D.-I., Valent, B., and Jordan, D.B. (2000) The Second  
46 Naphthol Reductase of Fungal Melanin Biosynthesis in *Magnaporthe grisea*: TETRAHYDROXYNAPHTHALENE  
47 REDUCTASE. *Journal of Biological Chemistry* **275**: 34867-34872.

- 1 Tsai, H.-F., Wheeler, M.H., Chang, Y.C., and Kwon-Chung, K.J. (1999) A Developmentally Regulated Gene  
2 Cluster Involved in Conidial Pigment Biosynthesis in *Aspergillus fumigatus*. *Journal of Bacteriology* **181**: 6469-  
3 6477.
- 4 Tsuji, G., Kenmochi, Y., Takano, Y., Sweigard, J., Farrall, L., Furusawa, I. et al. (2000) Novel fungal  
5 transcriptional activators, Cmr1p of *Colletotrichum lagenarium* and Pig1p of *Magnaporthe grisea*, contain  
6 Cys2His2 zinc finger and Zn(II)<sub>2</sub>Cys6 binuclear cluster DNA-binding motifs and regulate transcription of  
7 melanin biosynthesis genes in a developmentally specific manner. *Molecular Microbiology* **38**: 940-954.
- 8 VanderMolen, K.M., Raja, H.A., El-Elimat, T., and Oberlies, N.H. (2013) Evaluation of culture media for the  
9 production of secondary metabolites in a natural products screening program. *AMB Express* **3**: 71.
- 10 Weber, T., Blin, K., Duddela, S., Krug, D., Kim, H.U., Brucoleri, R. et al. (2015) antiSMASH 3.0—a  
11 comprehensive resource for the genome mining of biosynthetic gene clusters. *Nucleic Acids Research* **43**:  
12 W237-W243.
- 13 Weiss, U., Merlini, L., and Nasini, G. (1987) Naturally Occurring Perylenequinones. In *Fortschritte der Chemie*  
14 *organischer Naturstoffe / Progress in the Chemistry of Organic Natural Products*. Achenbach, H., Bhattacharyya,  
15 P., Chakraborty, D.P., Goto, T., Merlini, L., Nasini, G., and Weiss, U. (eds). Vienna: Springer Vienna, pp. 1-71.
- 16 Wheeler, M.H., and Bell, A.A. (1988) Melanins and Their Importance in Pathogenic Fungi. In *Current Topics in*  
17 *Medical Mycology*. McGinnis, M.R. (ed). New York, NY: Springer New York, pp. 338-387.
- 18 Williams, D.H., Stone, M.J., Hauck, P.R., and Rahman, S.K. (1989) Why are secondary metabolites (natural  
19 products) biosynthesized? *Journal of Natural Products* **52**: 1189-1208.
- 20 Zhang, A., Lu, P., Dahl-Roshak, A.M., Paress, P.S., Kennedy, S., Tkacz, J.S., and An, Z. (2003) Efficient  
21 disruption of a polyketide synthase gene (pks1) required for melanin synthesis through *Agrobacterium*-  
22 mediated transformation of *Glarea lozoyensis*. *Molecular Genetics and Genomics* **268**: 645-655.
- 23 Zhang, H., Gao, S., Lercher, M.J., Hu, S., and Chen, W.-H. (2012) EvolView, an online tool for visualizing,  
24 annotating and managing phylogenetic trees. *Nucleic Acids Research* **40**: W569-W572.
- 25 Zhao, N., Lin, X., Qi, S.-S., Luo, Z.-M., Chen, S.-L., and Yan, S.-Z. (2016) De Novo Transcriptome Assembly in  
26 *Shiraia bambusicola* to Investigate Putative Genes Involved in the Biosynthesis of Hypocrellin A. *International*  
27 *Journal of Molecular Sciences* **17**: 311.
- 28 Zhenjun, D., and Lown, J.W. (1990) Hypocrellins and their use in photosensitization. *Photochemistry and*  
29 *Photobiology* **52**: 609-616.

30

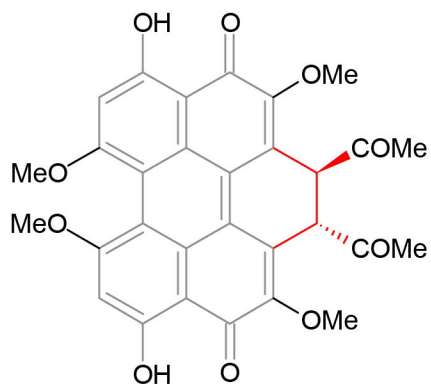

elsinochrome A

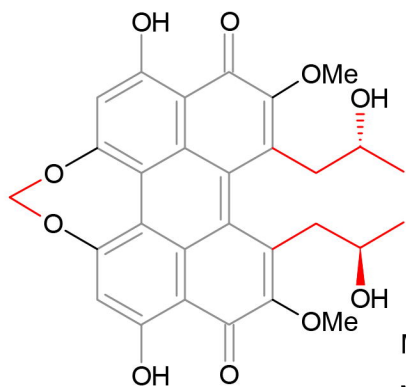

cercosporin

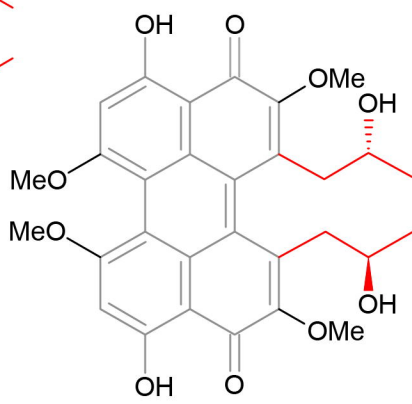

phleichrome

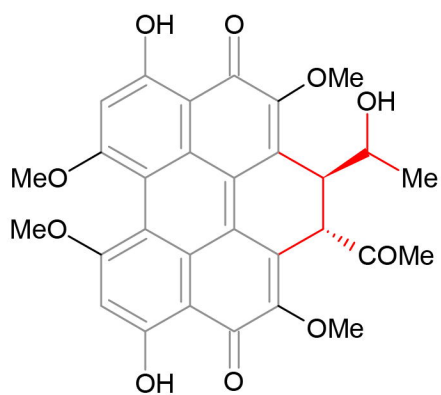

elsinochrome B

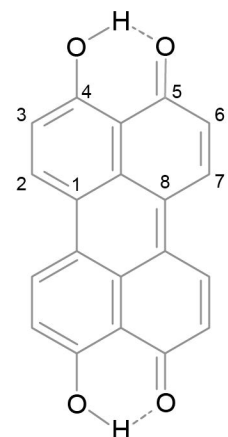

perylenequinone core

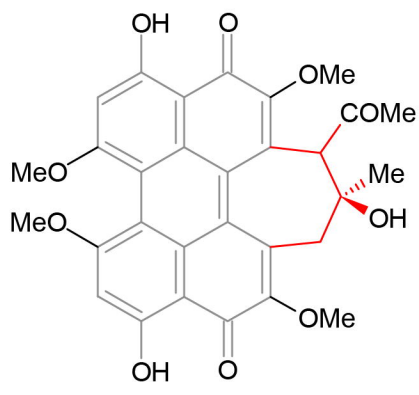

hypocrellin A

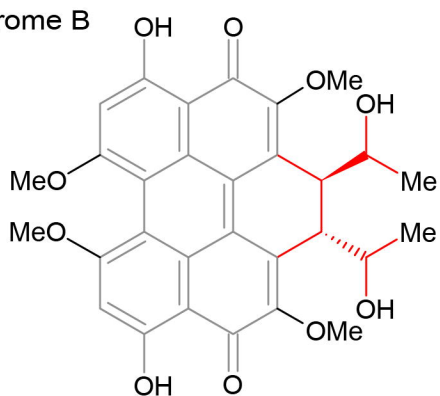

elsinochrome C

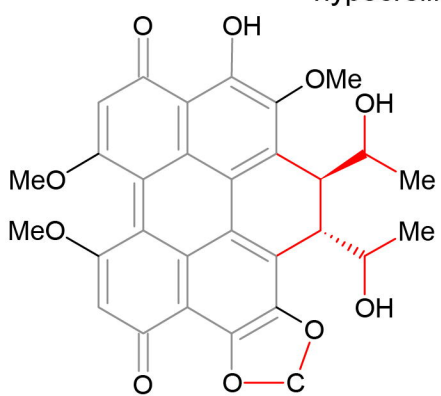

elsinochrome D

*M. oryzae* melanin pathway

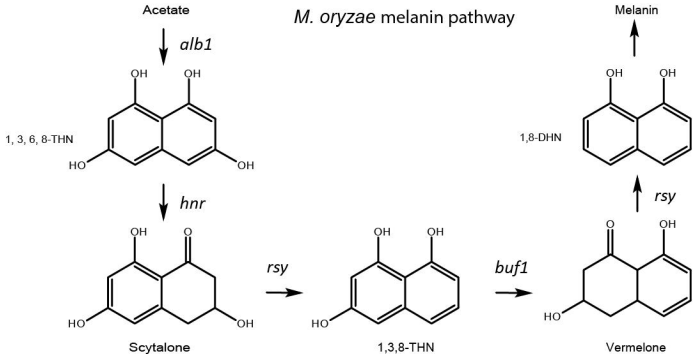

# Fam domains

- PF16073 (Starter unit, SAT)
- PF00109 (Beta-ketoacyl synthase, N-terminal domain)
- PF02801 (Beta-ketoacyl synthase, C-terminal domain)
- PF00698 (Acyl transferase domain)
- PF14765 (Polyketide synthase dehydratase)
- PF00550 (Phosphopantetheine attachment site)
- PF00975 (Thioesterase domain)
- PF07993 (Male sterility protein, NAD-binding)
- PF16197 (Ketoacyl-synthetase C-terminal extension)
- PF01494 (FAD binding domain)

## Taxonomic class

- Leotiomyces
- Dothideomycetes
- Sordariomycetes
- Eurotiomycetes

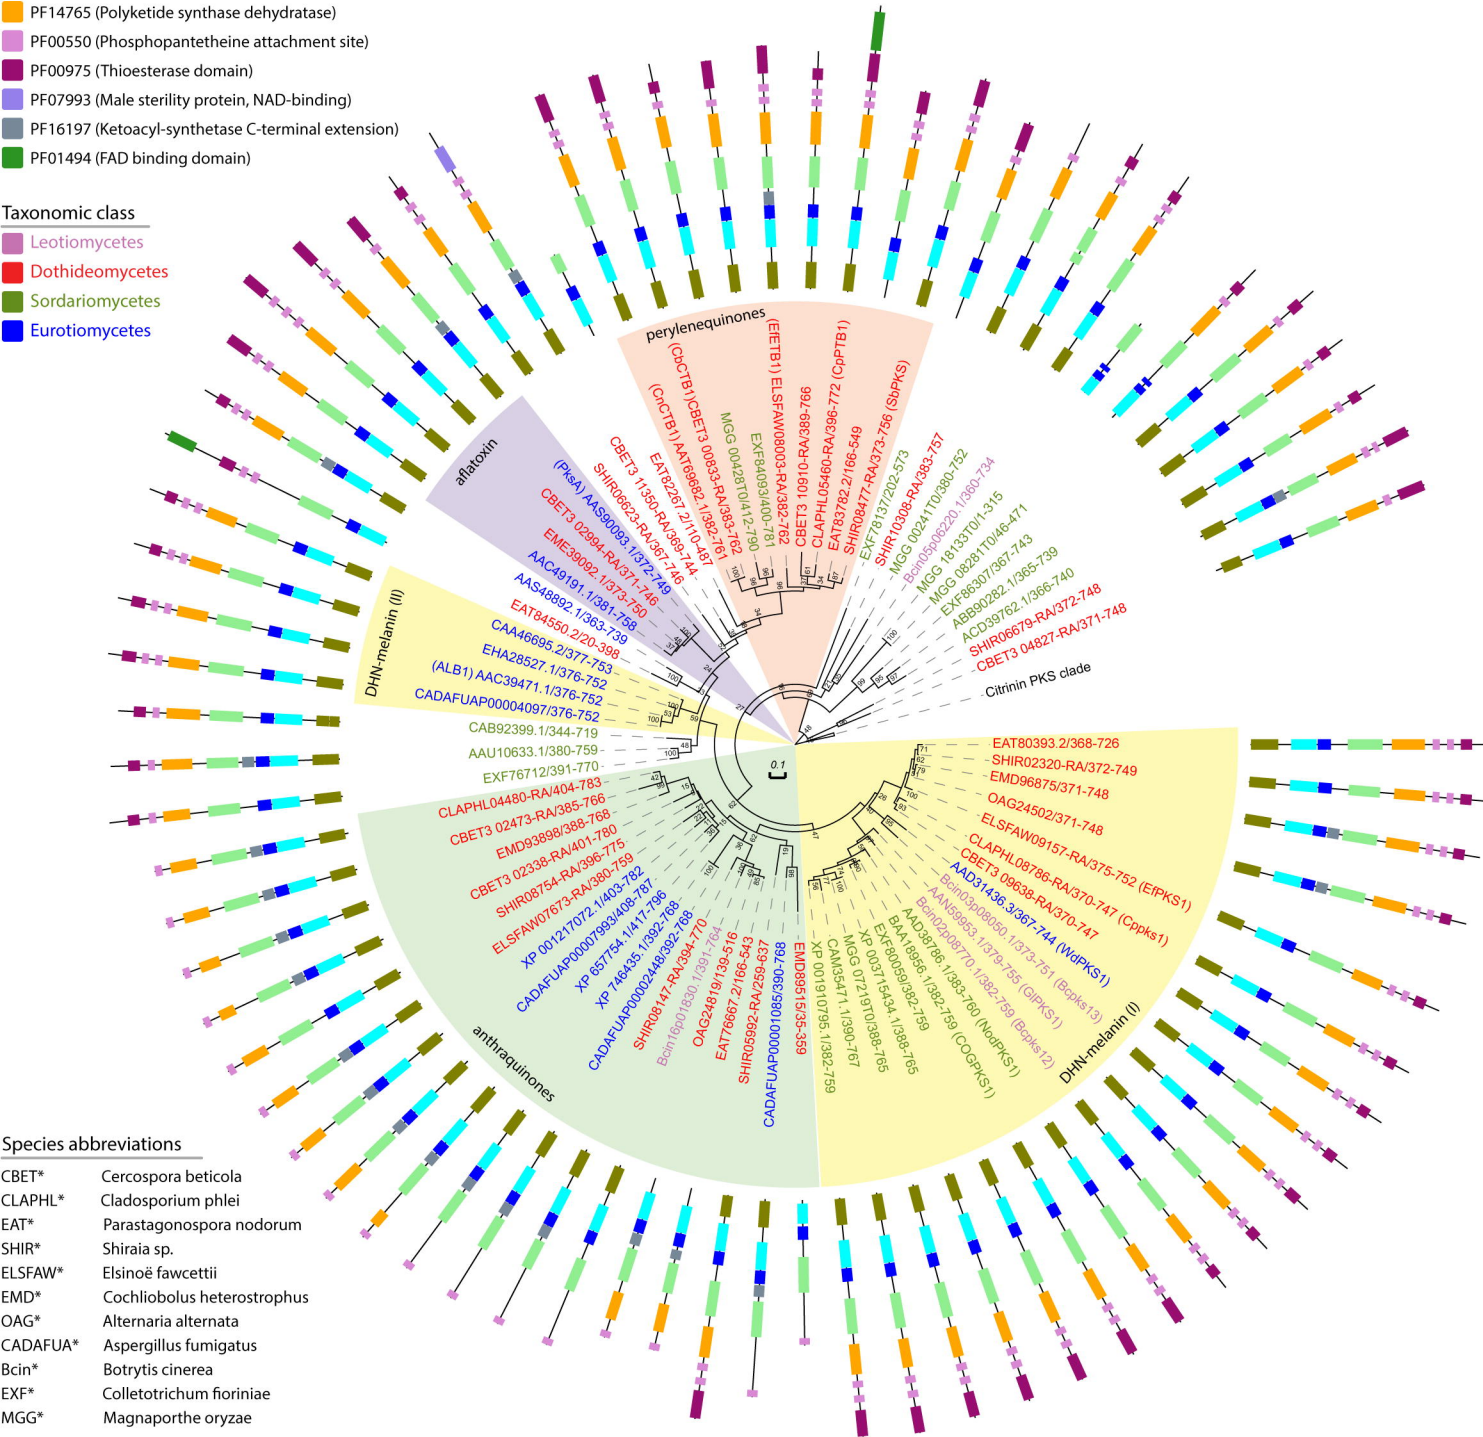

## Species abbreviations

- |          |                             |
|----------|-----------------------------|
| CBET*    | Cercospora beticola         |
| CLAPHL*  | Cladosporium phlei          |
| EAT*     | Parastagonospora nodorum    |
| SHIR*    | Shiraia sp.                 |
| ELSAFW*  | Elsinoë fawcettii           |
| EMD*     | Cochliobolus heterostrophus |
| OAG*     | Alternaria alternata        |
| CADAFUA* | Aspergillus fumigatus       |
| Bcin*    | Botrytis cinerea            |
| EXF*     | Colletotrichum fioriniae    |
| MGG*     | Magnaporthe oryzae          |

A)

*Aspergillus fumigatus**Elsinoe fawcettii**Cercospora beticola**Cladosporium phlei**Alternaria alternata**Bipolaris maydis**Parastagonospora nodorum**Shiraia sp.**Botrytis cinerea**Magnaporthe oryzae**Colletotrichum fioriniae*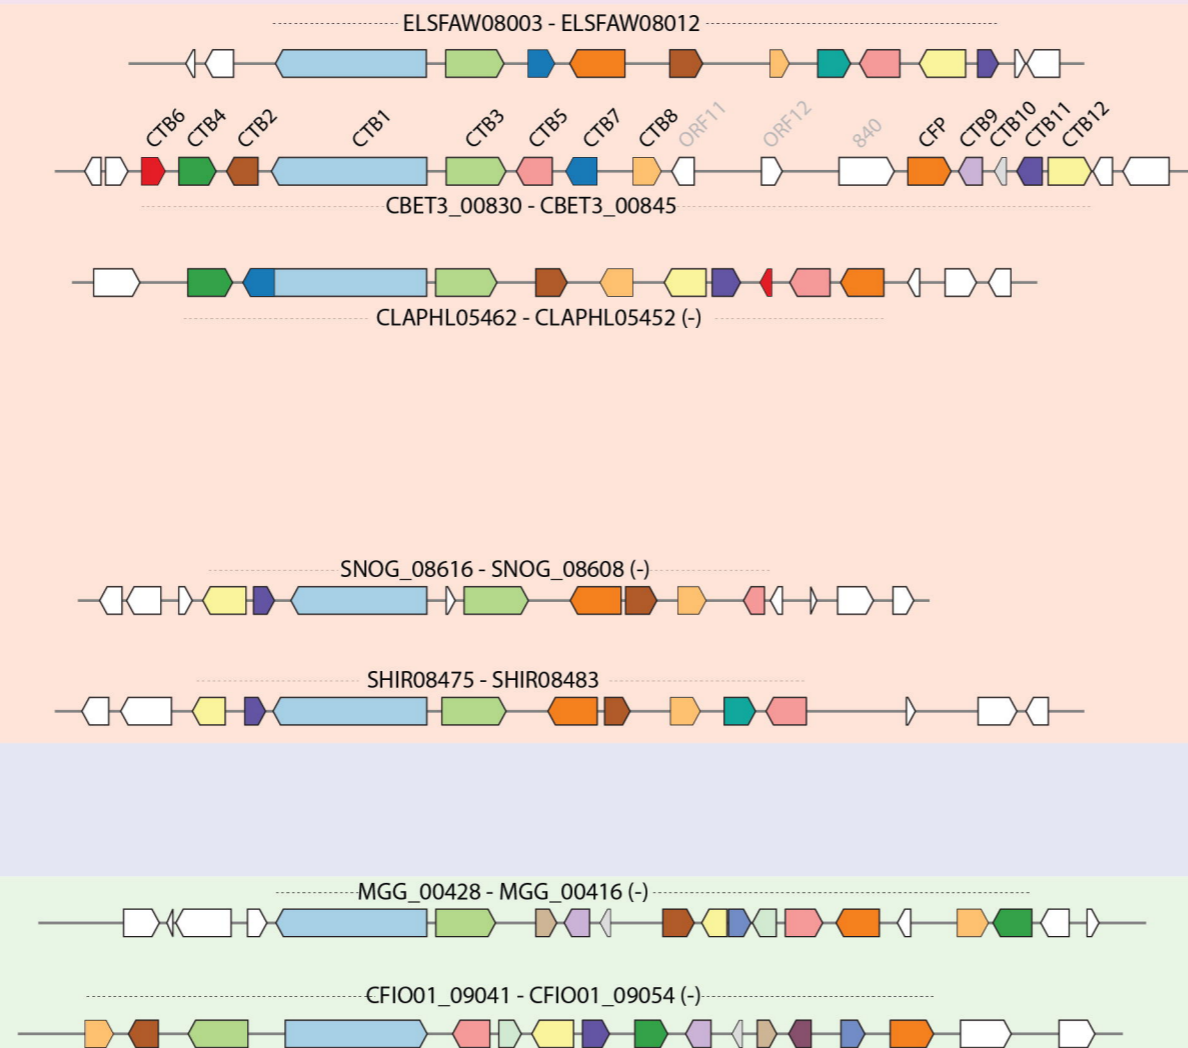

B)

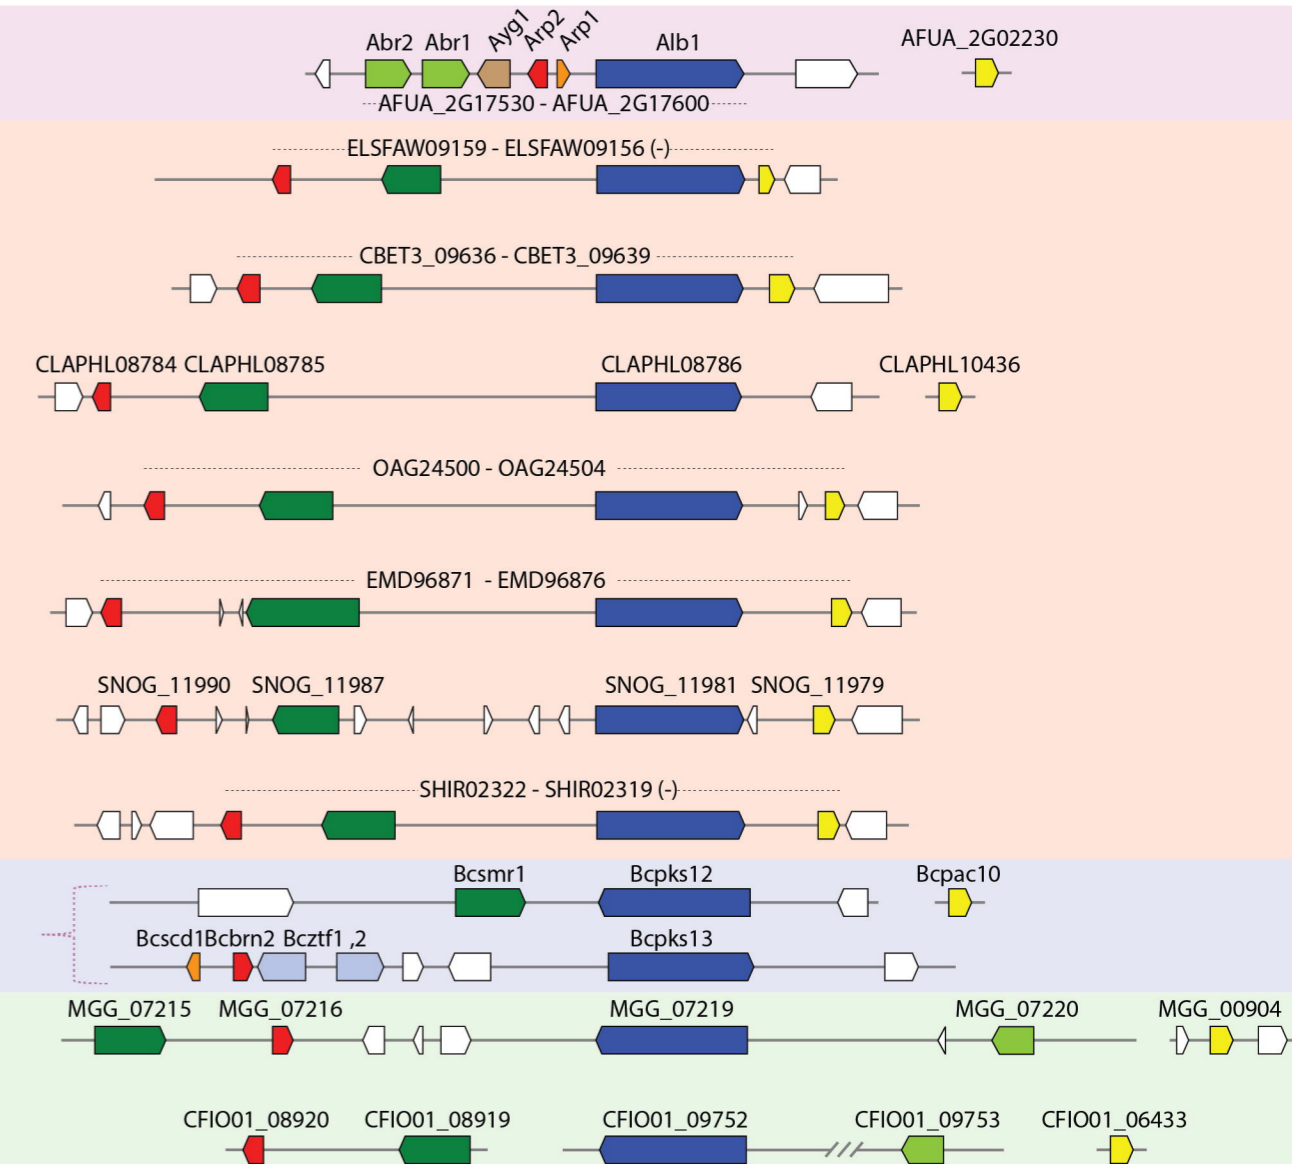

Taxonomic class

- Leotiomycetes
- Dothideomycetes
- Sordariomycetes
- Eurotiomycetes

Perylenequinone biosynthesis genes

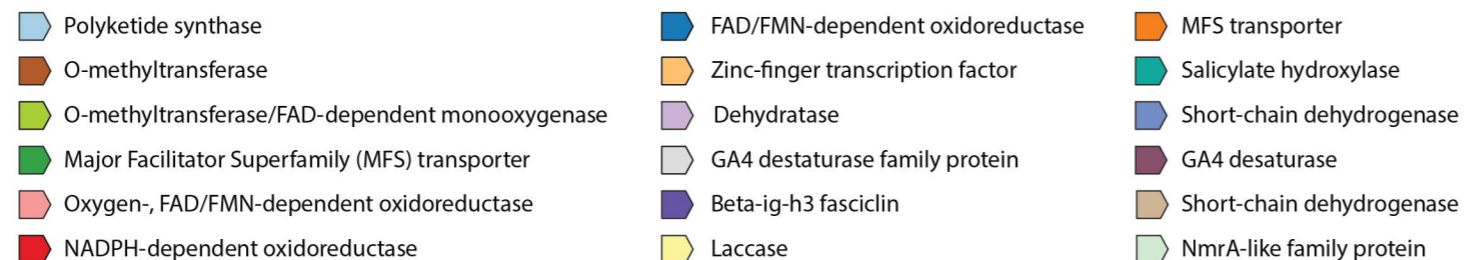

DHN-melanin biosynthesis genes

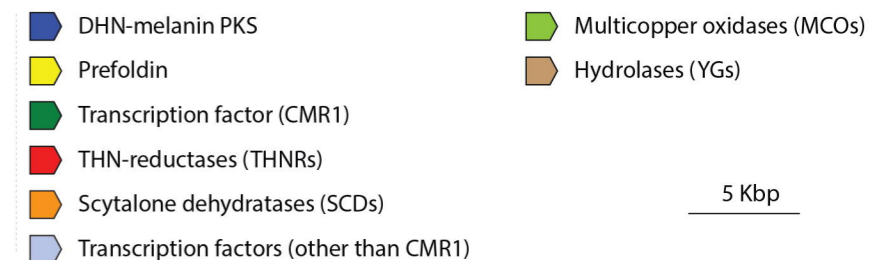

5 Kbp

# *Cercospora beticola*

*CTB9* –  $\alpha$ -ketoglutarate-dependent dioxygenase

*CTB10* – Dehydratase

*CTB4*, CLAPHL05462 – MFS transporter

*CTB6*, CLAPHL05454 – NADPH-dependent oxidoreductase

*Shiraia bambusicola*

*Cladosporium phlei*

SHIRO8482, ELSFAW08009 - Salicylate hydroxylase

*CTB7*, CLAPHL05461 (partial), ELSFAW08005 - FAD/FMN-dependent oxidoreductase

*Elsinoë fawcettii*

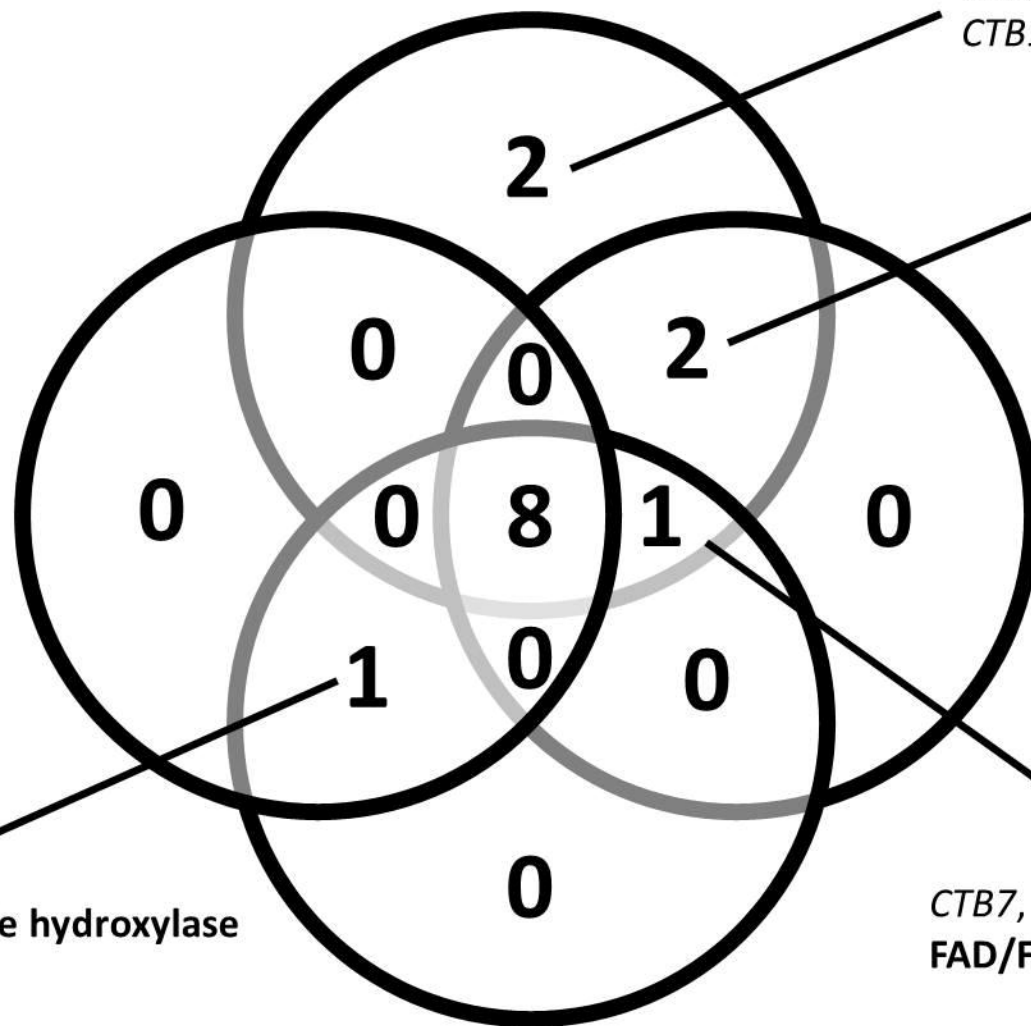



### (A) Cercosporin

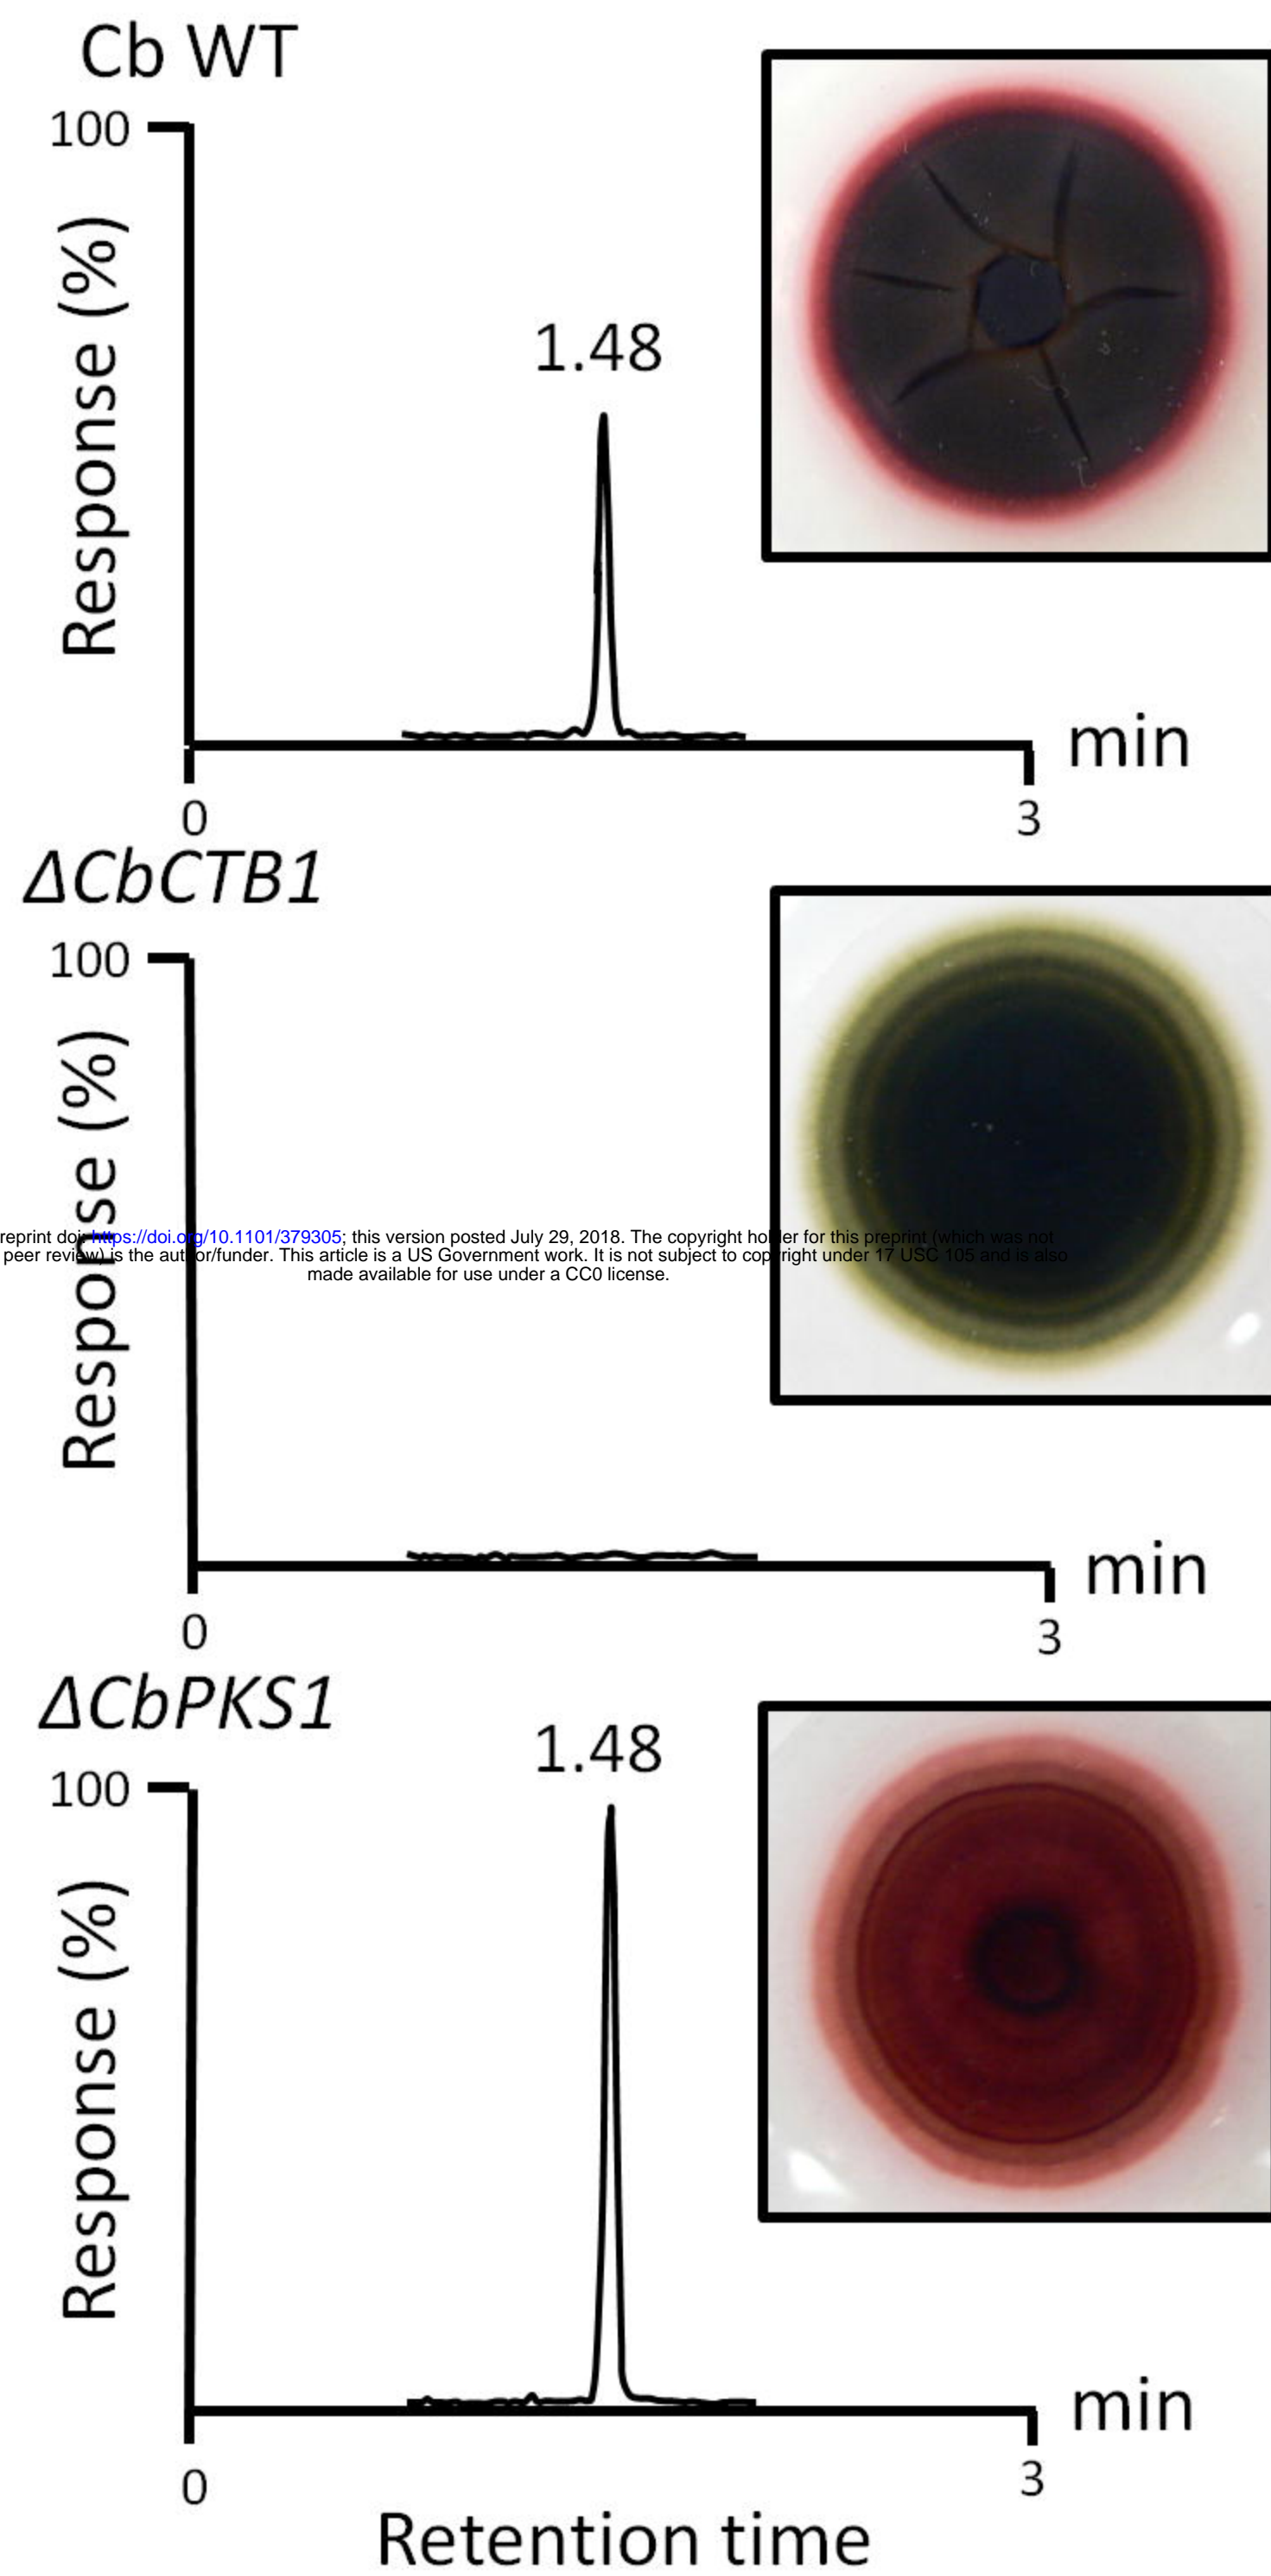

### (B) Elsinochrome B/D

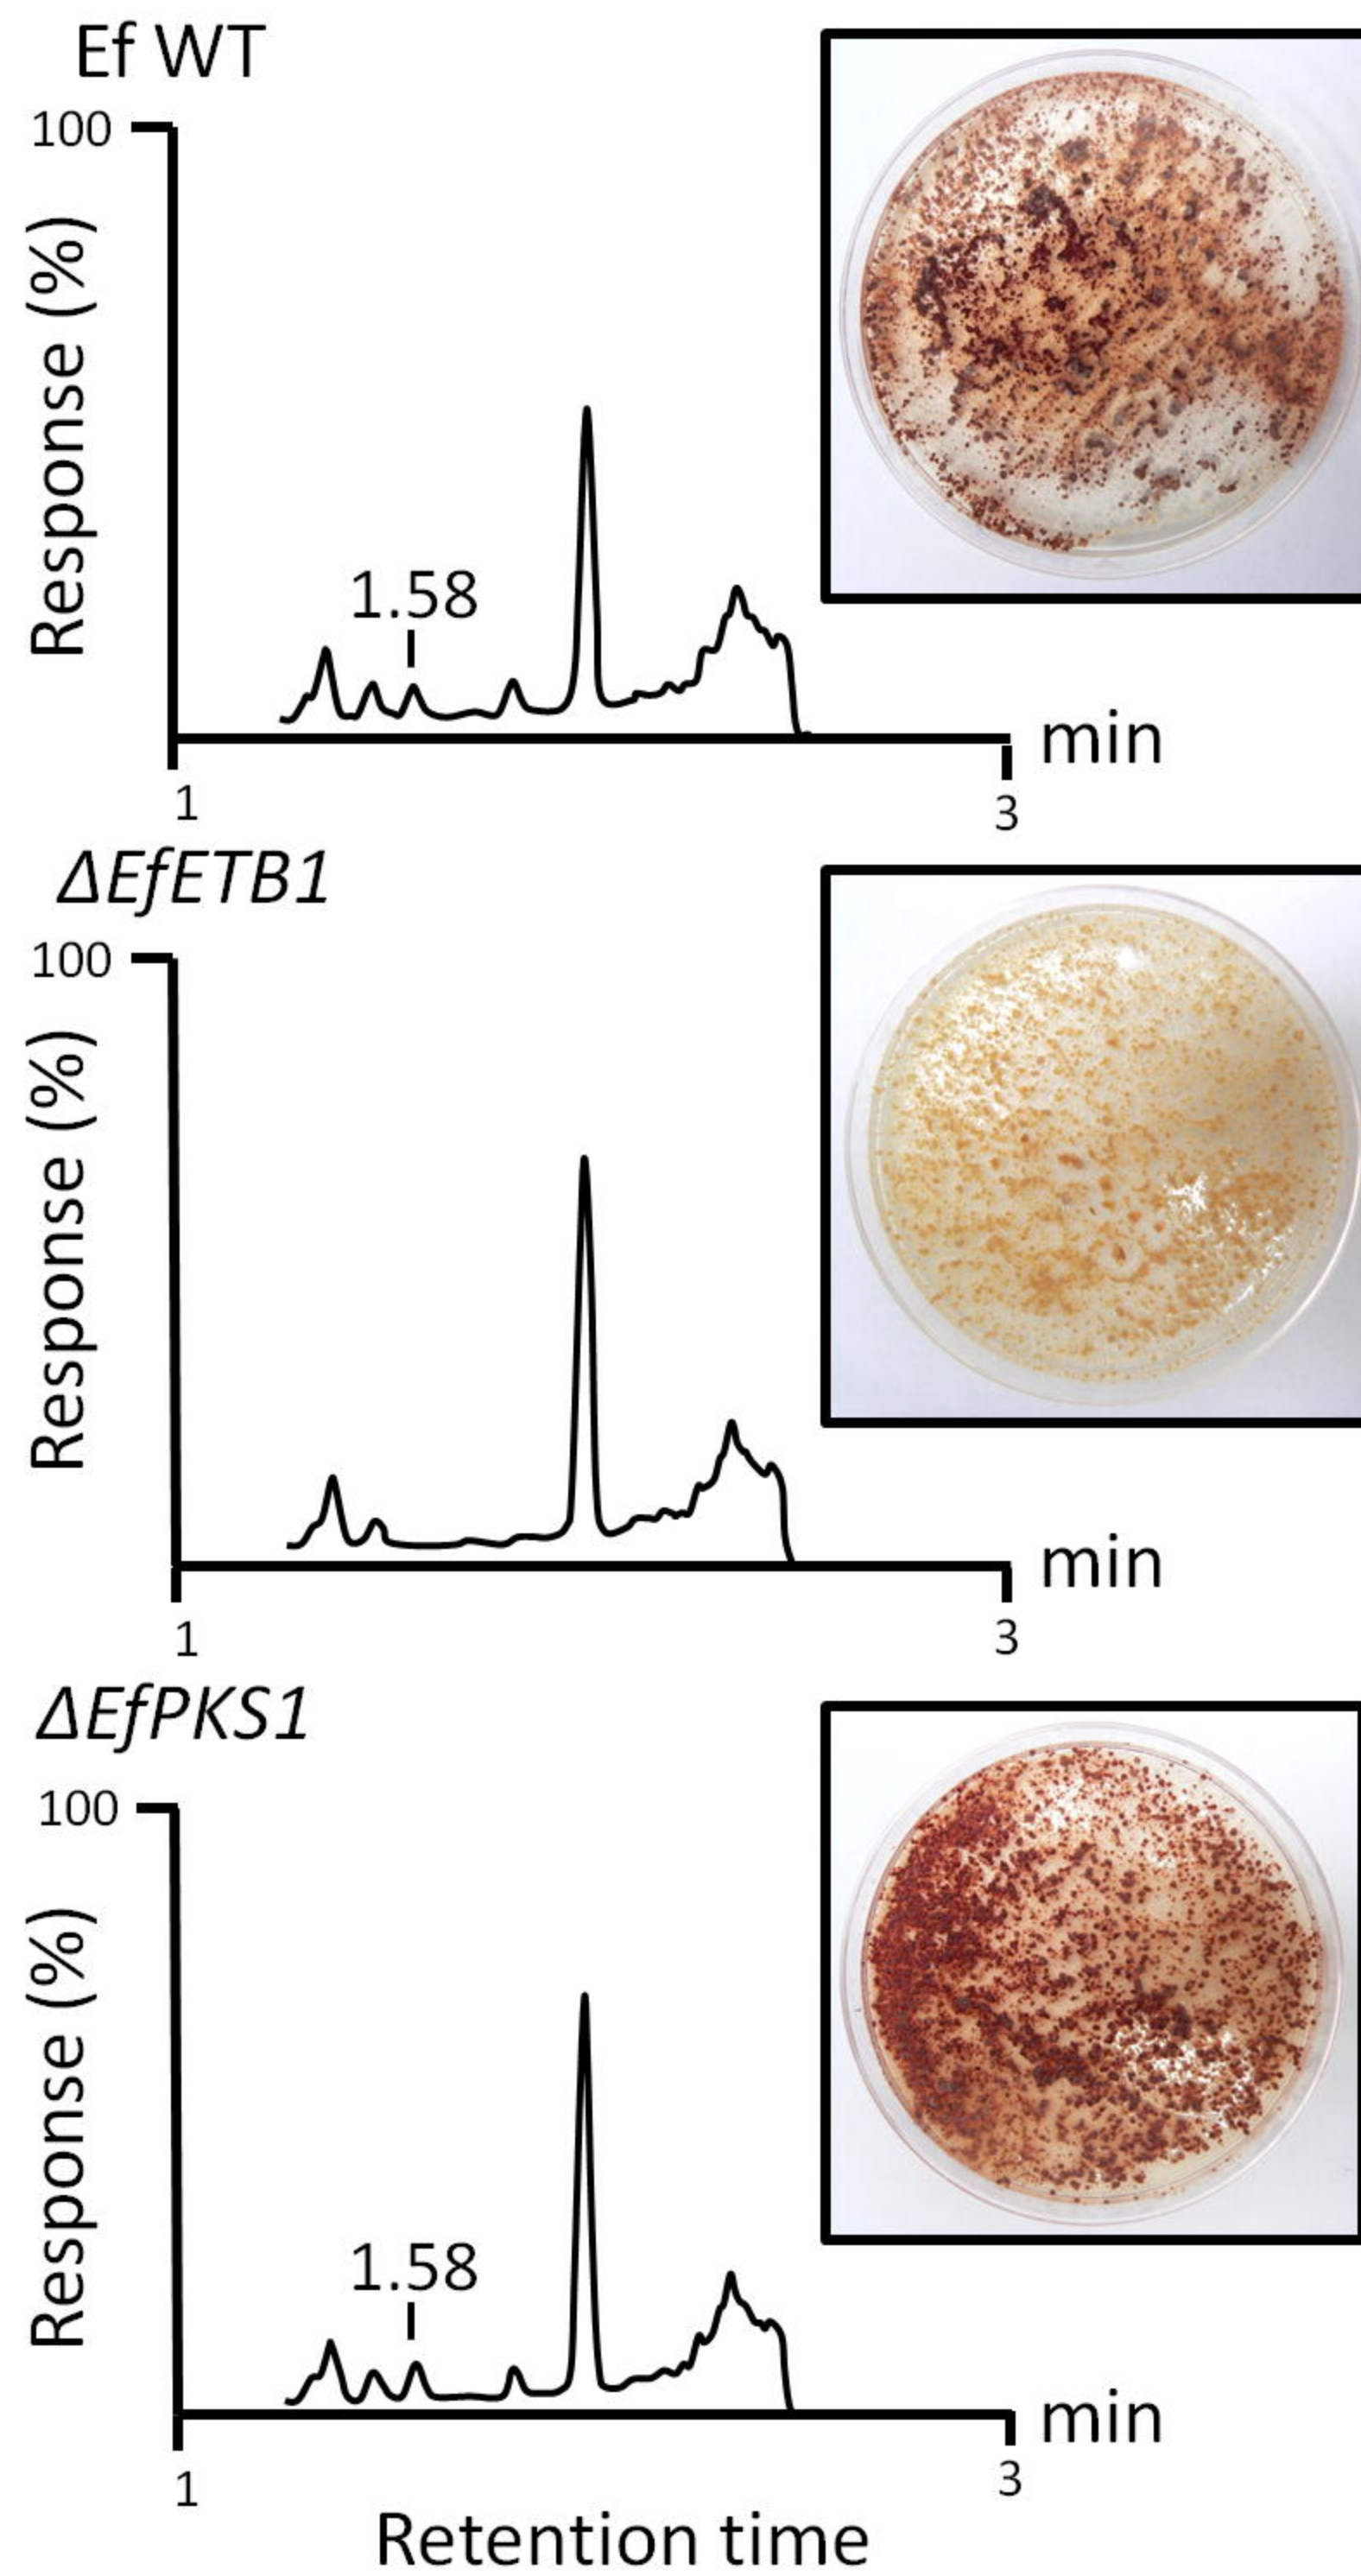

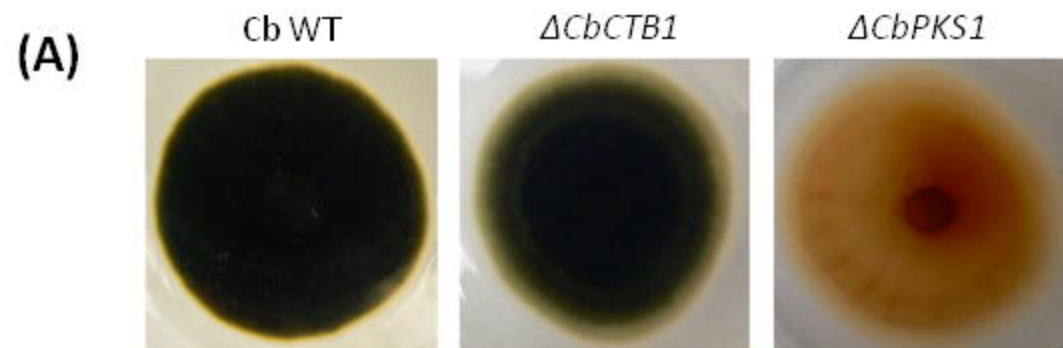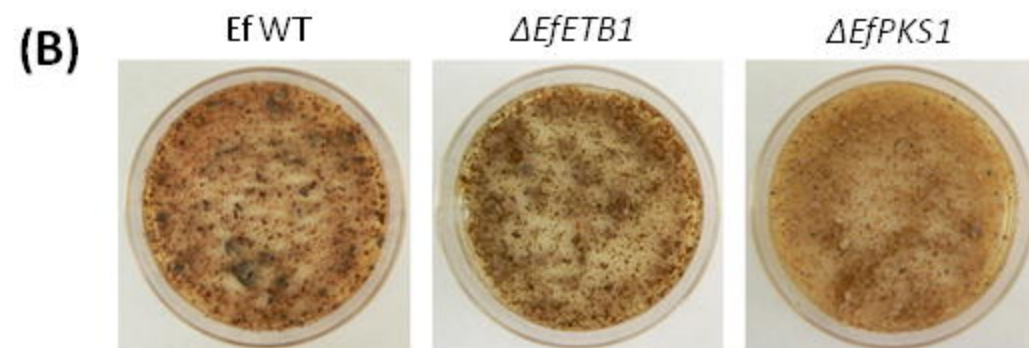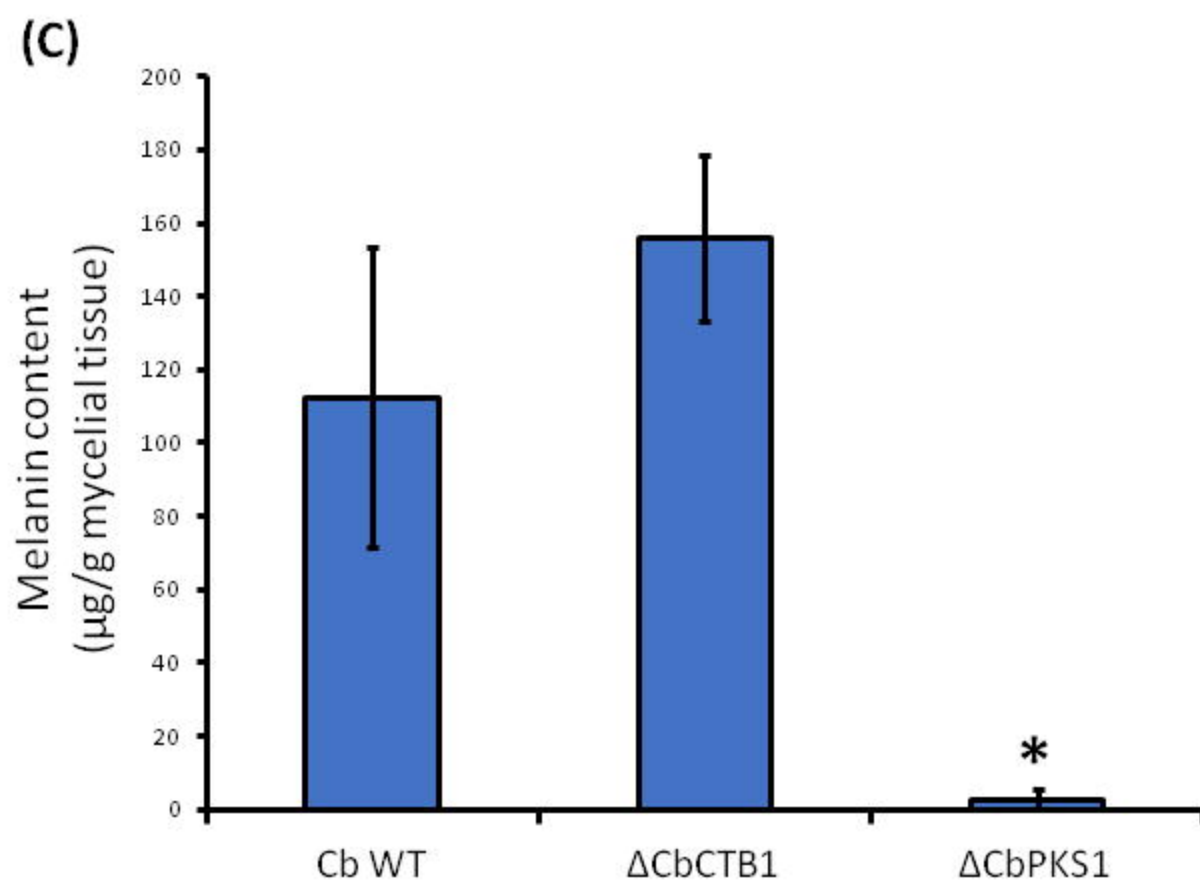

Source: https://www.biorxiv.org/content/10.1101/379305v1.full.pdf
